1        **HOX paralogs selectively convert binding of ubiquitous transcription factors into**  
2                                          **tissue-specific patterns of enhancer activation**

3

4    Laure Bridoux<sup>1\*</sup>, Peyman Zarrineh<sup>2\*</sup>, Joshua Mallen<sup>1</sup>, Mike Phuycharoen<sup>3</sup>, Victor Latorre<sup>1</sup>,  
5    Frank Ladam<sup>4</sup>, Marta Losa<sup>1</sup>, Charles Sagerstrom<sup>4</sup>, Kimberley A. Mace<sup>5</sup>, Magnus Rattray<sup>2</sup>  
6    and Nicoletta Bobola<sup>1,6</sup>

7

8    <sup>1</sup>School of Medical Sciences, <sup>2</sup>School of Health Sciences, <sup>3</sup>Department of Computer  
9    Science, <sup>5</sup>School of Biological Sciences, University of Manchester, Manchester, UK

10   <sup>4</sup>Department of Biochemistry and Molecular Pharmacology, University of Massachusetts  
11   Medical School, Worcester, MA, USA

12

13

14

15

16    \* These authors contributed equally

17    <sup>6</sup> Correspondence: [Nicoletta.Bobola@manchester.ac.uk](mailto:Nicoletta.Bobola@manchester.ac.uk)

18

## 19 **Summary**

20 Gene expression programs determine cell fate in embryonic development and their  
21 dysregulation results in disease. Transcription factors (TFs) control gene expression by  
22 binding to enhancers, but how TFs select and activate their target enhancers is still unclear.  
23 HOX TFs share conserved homeodomains with highly similar sequence recognition  
24 properties, yet they impart the identity of different animal body parts. To understand how  
25 HOX TFs control their specific transcriptional programs *in vivo*, we compared HOXA2 and  
26 HOXA3 binding profiles in the mouse embryo. HOXA2 and HOXA3 directly cooperate with  
27 TALE TFs and selectively target different subsets of a broad TALE chromatin platform.  
28 Binding of HOX and tissue-specific TFs convert low affinity TALE binding into high  
29 confidence, tissue-specific binding events, which bear the mark of active enhancers. We  
30 propose that HOX paralogs, alone and in combination with tissue-specific TFs, generate  
31 tissue-specific transcriptional outputs by modulating the activity of TALE TFs at selected  
32 enhancers.

33

## 34 **Introduction**

35 Gene expression programs instruct and maintain cell fate in embryonic development and  
36 adult tissue homeostasis. Transcription factors (TFs) control gene expression by binding to  
37 enhancers (Reiter et al., 2017; Spitz and Furlong, 2012). However, we still have no clear  
38 idea of how TFs select their precise sets of target enhancers. While TFs contain DNA  
39 binding domains which recognize DNA in a sequence-specific manner, these interactions  
40 are typically insufficient to direct a TF to its functional targets.

41 Transcriptional regulation is mediated by TFs working together, rather than in isolation. The  
42 widespread occurrence of collaborative TF binding is imposed by chromatin. A single TF  
43 cannot easily compete with nucleosomes to access DNA, but multiple TFs that recognize  
44 closely spaced binding sites can effectively displace nucleosomes and indirectly facilitate  
45 each other's binding (Mirny, 2010; Moyle-Heyrman et al., 2011). Such indirect cooperativity  
46 can also result in TFs recognizing low affinity sites, i.e. sites that deviate from their optimal

47 consensus *in vitro* (Farley et al., 2015). Recent observations indicate that TF cooperativity  
48 does not end at binding enhancers: clusters of enhancer-bound TFs concentrate co-  
49 activators and other nuclear factors via dynamic fuzzy interactions, driven by their  
50 intrinsically disordered regions (IDRs). IDRs function in molecular recognition and mediate  
51 the interaction with a diversity of regulatory proteins (Cumberworth et al., 2013; Staby et al.,  
52 2017) to promote the liquid-liquid phase transition associated with gene activation (Boija et  
53 al., 2018). Thus, the formation, on DNA segments, of regulatory complexes made of different  
54 combinations of factors, is key to activation of gene expression. These distinct combinations  
55 of TFs produce virtually inexhaustible flavours of gene expression and cell fate (Spitz and  
56 Furlong, 2012).

57 HOX TFs provide an ideal model to explain how TFs select their target enhancers to direct  
58 specific transcriptional programs *in vivo*. They contain a homeodomain (HD), a highly  
59 conserved DNA binding moiety shared by hundreds of TFs (Bobola and Merabet, 2017;  
60 Burglin and Affolter, 2016). HD display highly similar sequence recognition properties and  
61 bind the same core of four-base-pair sequence TAAT (Noyes et al., 2008), yet HOX TFs  
62 function to establish the identity of entirely different body parts along the antero-posterior  
63 axis of all bilaterian animals (Krumlauf, 1994; Pearson et al., 2005). In mammals, there are  
64 39 *Hox* genes, classified into anterior (HOX1-2), central (HOX3-8), and posterior (HOX 9-  
65 13) paralog groups (Rezsöházy et al., 2015). HOX paralogs occupy sequential positions  
66 along the chromosome, which are faithfully maintained across evolution (Duboule, 2007).  
67 This translates into precise HOX expression codes at different levels of the antero-posterior  
68 axis, conferring specific spatial and temporal coordinates to each cell.

69 HOX association with three amino acid loop extension (TALE) HD TFs PBX, and PBX  
70 partner MEIS, is a widely accepted mechanism underlying HOX target specificity (Bobola  
71 and Merabet, 2017; Merabet and Mann, 2016; Selleri et al., 2019). HOX-TALE cooperativity  
72 increases the affinity and sequence selectivity of HOX TFs *in vitro* (Merabet and Mann,  
73 2016). *In vivo*, HOXA2 extensively binds with TALE TFs (Amin et al., 2015) and Ubx and Hth  
74 (fly homologs to vertebrate central HOX and MEIS respectively) co-localize in active nuclear

75 microenvironments, suggesting that their interaction may be critical to trigger phase  
76 separation (Tsai et al., 2017). Interestingly, Hox binding selectivity can be observed in the  
77 absence of TALE TFs, and is strongly associated with chromatin accessibility (Porcelli,  
78 2019). Although the concept of HOX and TALE interaction is long established, we still  
79 understand relatively little about the extent and functional significance of HOX-TALE  
80 association *in vivo*, where compaction of DNA into chromatin and the distribution of  
81 sequence-specific TFs (cell-specific and tissue-specific, but also ubiquitous) can  
82 considerably affect TF binding to DNA. Also, how the association with fairly ubiquitous  
83 proteins eventually translates into HOX paralog-specific transcriptional outputs *in vivo*,  
84 remains unclear.

85 To understand how HOX TFs execute their specific functions to impart different segmental  
86 identity *in vivo*, we compared binding of HOXA2 and HOXA3, an anterior and a central HOX  
87 proteins, in the physiological tissues where these TFs are active. Branchial arches (BA) are  
88 blocks of embryonic tissues that merge to form the face and the neck in vertebrates. The  
89 second and third branchial arch (BA2 and BA3) are the main domains of HOXA2 and  
90 HOXA3 expression respectively, and the embryonic areas most affected by inactivation of  
91 *Hoxa2* and *Hoxa3* in mouse (Gendron-Maguire et al., 1993; Manley and Capecchi, 1995;  
92 Rijli et al., 1993). We find that HOXA2 and HOXA3 occupy a large set of high-confidence,  
93 non-overlapping genomic regions, that are also bound by TALE TFs. We identify three main  
94 determinants of HOX paralog-selective binding, resulting in high-confidence cooperative  
95 HOX-TALE binding at different genomic locations: recognition of unique variants of the HOX-  
96 PBX motif, differential affinity at shared HOX-PBX motifs and, additional contribution of  
97 tissue-specific TFs. We propose that HOX paralogs operate, alone and in concert with  
98 tissue-specific TFs, to switch on TALE function at selected enhancers.

99

## 100 **Results**

### 101 **HOXA2 and HOXA3 control diverse processes by targeting different regions of the** 102 **genome**

103 HOX TFs direct highly specific gene expression programs *in vivo*, but recognize very similar  
104 DNA sequences *in vitro*. However, it remains to be determined if HOX specificity of action  
105 reflects specificity of binding across the genome *in vivo*, i.e. the binding of paralog HOX TFs  
106 to distinct target regions. To establish this, we compared HOXA2 and HOXA3 binding  
107 profiles in their physiological domains of expression in the mouse embryo. BAs display an  
108 antero-posterior gradient of HOX expression, which replicates *Hox* gene positions on the  
109 chromosome (Fig. 1AB): BA1 does not express any *Hox* gene, BA2 expresses *Hox2*  
110 paralogs, BA3 *Hox3* paralogs, etc. We previously characterized HOXA2 binding in BA2  
111 (Amin et al., 2015); here, we profiled HOXA3 binding in BA3-4-6 (hereafter referred to as  
112 posterior branchial arches, PBA), the embryonic tissues immediately posterior to the BA2  
113 (identified by the expression of *Hox* paralogs 3-5, Fig. 1AB). Using a HOXA3-specific  
114 antibody (Fig. 1- Supplemental Fig. 1A), we identified 848 peaks with fold enrichment (FE)  
115  $\geq 10$ , which largely contained a second biological replicate (Fig. 1- Supplemental Fig. 1B).  
116 TALE TFs (PBX and MEIS) display cooperative binding with HOX and increase HOX binding  
117 specificity *in vitro* (Merabet and Mann, 2016). De novo motif discovery (Heinz et al., 2010)  
118 identified HOX-PBX recognition sequence as the top enriched motif in HOXA3 peaks and  
119 uncovered MEIS binding site in the top three sequence motifs (Fig. 1- Supplemental Fig.  
120 1C). HOXA3 recognition sites in PBA correspond to HOXA2 motifs in BA2; moreover, the  
121 distribution of HOX-PBX motifs is comparable across HOXA2 and HOXA3 peaks. HOX  
122 peaks without a canonical HOX-PBX consensus motif, contain potential low affinity variants  
123 of HOX-PBX sites (Fig. 1- Supplemental Fig. 1D-F). The occurrence of high affinity sites  
124 (perfect matches) positively correlates with peak FE, and is highest in top HOXA2 and  
125 HOXA3 peaks. Low affinity sites (1 mismatch) show the opposite trend and occur with higher  
126 frequency in lower confidence binding events (Fig. 1- Supplemental Fig. 1D-F).  
127 We overlapped HOXA2 binding in BA2 with HOXA3 binding in PBA. About half of HOXA3  
128 peaks are contained in the larger HOXA2 datasets (Fig. 1CD). When comparing the same  
129 number of peaks for both datasets, ranked by FE, we observed an increasing overlap at  
130 lower confidence peaks (Fig. 1E), suggesting that HOXA2 and HOXA3 select different sites

131 when binding with higher affinity and are more promiscuous at lower binding levels.  
132 Functional association of HOXA3-specific peaks in PBA and HOXA2-specific peaks in BA2  
133 (McLean et al., 2010)(Fig. 1FG) highlights distinct biological processes and mouse  
134 phenotypes, including abnormal middle ear, sphenoid, temporal and squamosal bone  
135 morphologies, whose morphogenesis is controlled by HOXA2 (Gendron-Maguire et al.,  
136 1993; Rijli et al., 1993). In contrast HOXA3-specific binding is almost exclusively associated  
137 with heart and cardiac muscle development and cardiovascular phenotypes, consistent with  
138 the role of HOXA3 in the formation of the main arteries (Manley and Capecchi, 1995, 1997)  
139 (Fig. 1F). These observations are in line with HOX functional specificity and indicate that in  
140 their physiological domains of expression, HOXA2 and HOXA3 bind in the vicinity of, and  
141 potentially control, genes involved in very different processes. *Hoxa2* expression displays a  
142 sharp anterior border between BA1 and BA2 and expands in the more posterior PBA (Fig.  
143 1A; Fig. 4A). We profiled HOXA2 binding in PBA to understand if HOX-specific binding is  
144 determined by differences in the BA2 and PBA chromatin environment. We found that  
145 HOXA2 peaks in PBA very rarely overlap with HOXA3 'only' peaks in the same tissue (1%  
146 overlap), but are largely contained in the pool of HOXA2-specific binding in BA2 and  
147 'common' HOXA2 and HOXA3 binding events (Fig. 1H). This argues against differences in  
148 chromatin accessibility being a main determinant of HOX binding. In sum, analysis of  
149 HOXA2 and HOXA3 ChIP-seq in their respective domains of expression indicates that  
150 different HOX TFs control diverse and specific processes by targeting different regions of the  
151 genome *in vivo*. Tissue-specific chromatin accessibility does not appear to be a major  
152 determinant in HOX paralogs' target site selection.

### 153 **HOXA2 and HOXA3 select variants of the HOX/PBX motif**

154 The observations above indicate that HOXA2 and HOXA3 select different genomic sites *in*  
155 *vivo*, while at a first glance, they recognize very similar DNA sequences. To investigate the  
156 determinants of HOX binding specificity, we focused on high confidence HOXA2 and  
157 HOXA3 peaks, which display the lowest overlap across the genome (Fig. 1E). *De novo* motif  
158 discovery identified enrichment of a HOX-PBX variant in HOXA3 top 250 peaks, which

159 contains a C in the second variable position (i.e. TGAT**NCAT**) (Fig. 2A). We next counted  
160 the distribution of all permutations of the TGATNNAT motif in top HOXA2 and HOXA3 peaks  
161 and found the TGAT**TCAT** variant to be highly differentially enriched in HOXA3 peaks (Fig.  
162 2B). This sequence, which is highly represented in HOXA3 top peaks (~ 20%), is almost  
163 excluded from HOXA2 peaks (Fig. 2B). Supporting functional significance, HOXA3 peaks  
164 containing TGAT**TCAT** display increased acetylation levels (a mark of active enhancers)  
165 (Creyghton et al., 2010) in HOXA3-expressing tissues (Fig. 2C). In addition, while HOXA2  
166 peaks display a very high representation of TGAT**GGAT** and TGAT**TGAT**, HOXA3 high  
167 confidence binding allows higher variability (four variants are counted > 20 times in HOXA3  
168 peaks as opposed to only two variants in top HOXA2 peaks) (Fig. 2B). The highest  
169 differential enrichment of TGATNNAT variants is observed in top HOXA2 and HOXA3 peaks  
170 (Fig. 2- Supplemental Fig. 1A), which also display minimal overlap across the genome (Fig.  
171 1E); this suggests that the ability to recognize different sequences plays a role in genomic  
172 site selections. Finally, the majority of HOXA3 (158/250) and HOXA2 (160/250) top peaks  
173 contain MEIS recognition motif, at a preferential distance of less than 20 nt from the  
174 TGATNNAT motif (Fig. 2- Supplemental Fig. 1B). The *Sulf2* locus exemplifies HOXA3  
175 specific binding in PBA: it contains a single TGAT**TCAT** motif and displays high HOXA3  
176 occupancy, but no detectable HOXA2 binding (Fig. 2DE). We used electrophoretic mobility  
177 shift assay (EMSA) to establish if HOXA3 preferentially recognizes the TGATTCAT  
178 sequence *in vitro*. We did not observe any HOXA2 or HOXA3 binding to the *Sulf2* probe  
179 (Fig. 2F). Incubation with PBX and MEIS resulted in a probe shift. Addition of HOXA3, but  
180 not HOXA2, resulted in the formation of a ternary complex, indicating that HOXA3 can bind  
181 this site in combination with PBX and MEIS, while HOXA2 cannot (Fig. 2F). In support of this  
182 conclusion, converting TGATTCAT to TGAT**TGAT** (a single nucleotide substitution in the  
183 *Sulf2* probe), enables binding of HOXA2, in addition to HOXA3 (Fig. 2G). These results  
184 indicate that HOXA3 and HOXA2 have diverse binding preferences and uncover the  
185 existence of sites that are exclusively recognized by HOXA3.

#### 186 **HOXA2 molecular control of BA2 identity**

187 In contrast to HOXA3, which displays unique binding preferences for TGATTCAT, we did not  
188 detect HOX-PBX variants exclusively recognized by HOXA2. To investigate the mechanisms  
189 underlying HOXA2 control of BA2 identity, we examined HOXA2 binding events (top peaks)  
190 in the vicinity of well-established HOXA2 downstream targets. *Meis2* and *Zfp703* are  
191 associated with high levels of HOXA2 binding (Amin et al., 2015) (Fig. 3A and Fig. 3-  
192 Supplemental Fig. 1A) and are downregulated in *Hoxa2* null BA2 (Donaldson et al., 2012). In  
193 addition, consistent with *Meis2* and *Zfp703* expression being HOXA2-dependent, they are  
194 expressed at higher levels in BA2 than the HOX-less BA1 and the HOXA3-positive PBA  
195 (Fig. 3B). *Meis2* and *Zfp703* loci exhibit high HOXA2 and HOXA3 binding in their vicinity,  
196 suggesting their associated chromatin is largely accessible in both BA2 and PBA (Fig. 3A  
197 and Fig. 3- Supplemental Fig. 1A). We focused primarily on the *Meis2* enhancer, which is  
198 active in the main domains of HOXA2 expression, the hindbrain and BAs in zebrafish (Fig.  
199 3C). When tested in a luciferase assay, the *Meis2* functional enhancer displays higher  
200 activity in the presence of HOXA2, in combination with MEIS and PBX, relative to HOXA3  
201 (Fig. 3D). *Meis2* enhancer activity is strictly dependent on the integrity of its HOX-PBX site  
202 (Fig. 3D and Fig. 3F). Similar results were obtained with *Zfp703* putative enhancer, however  
203 in this case, HOXA2 and HOXA3 alone resulted in higher activation, presumably due to the  
204 presence of additional TAAT sites around the HOX/PBX motif (Fig. 3- Supplemental Fig.  
205 1B). As for the *Meis2* enhancer, disruption of the HOX/PBX site nearly abolished activation  
206 (Fig. 3- Supplemental Fig. 1B). Finally, HOXD3, another HOX paralog group 3, also  
207 displayed a lower activating capacity than HOXA2 (Fig. 3- Supplemental Fig. 1C). In sum,  
208 HOXA2 is more efficient at activating both target regions, in the presence of PBX and MEIS.  
209 To understand if this reflects HOXA2 and HOXA3 different DNA binding properties, we  
210 generated HOX chimeric proteins by swapping HOXA2 and HOXA3 DNA-binding HDs. We  
211 found that providing HOXA2 with HOXA3 HD did not substantially change the ability of  
212 HOXA2 to activate transcription from the *Meis2* enhancer (Fig. 3E). Similarly, the ability of  
213 HOXA3 to transactivate the *Meis2* and *Zfp703* enhancers, alone or in complex with MEIS  
214 and PBX, was not improved by swapping HOXA3 HD with HOXA2 HD (Fig. 3E and Fig. 3-



215 Supplemental Fig. 1B). As HOX TFs cooperate with MEIS and PBX to activate target  
216 enhancers and activation relies on the presence of an intact HOX/PBX motif, HOXA2 and  
217 HOXA3 diverse activation properties may depend on their respective abilities to interact with  
218 PBX and MEIS on DNA. On their own, HOXA2 and HOXA3 weakly bind the *Meis2*  
219 enhancer, but interact with PBX and MEIS to form a ternary protein complex on DNA (Fig.  
220 3G-H). A larger fraction of MEIS-PBX complex is bound by HOXA2, while addition of HOXA3  
221 result in a less robust supershift (Fig. 3GH). We observed the same binding patterns using  
222 HOX chimeras: swapping HOXA3-HD with HOXA2-HD did not improve the ability of HOXA3  
223 to form a ternary complex with PBX and MEIS, and did not affect HOXA2 ability to bind DNA  
224 in complex with MEIS and PBX (Fig. 3I). Finally, altering the sequence of the HOX-PBX  
225 motif abolished formation of a HOX-MEIS-PBX complex on DNA (Fig. 3J). These results  
226 indicate that the differential ability of HOXA2 and HOXA3 to bind and activate transcription  
227 does not depend on HOX-DNA binary binding. Rather, it reflects differential abilities to form  
228 functional HOX-TALE complexes on DNA and is encoded by residues outside the HOXA2  
229 and HOXA3 HD. In summary, while HOXA2 does not exclusively access its sites (HOXA3  
230 can bind as well, Fig. 3A), HOXA2 binds more efficiently with TALE at these sites, leading to  
231 increased transcriptional activation. Consistently, shared high-confidence HOXA2 and  
232 HOXA3 binding events are largely associated with genes expressed at higher levels in the  
233 BA2 (Fig. 3K). Thus, at least in part, HOXA2 instructs the formation of a BA2 by raising the  
234 expression levels of HOX-regulated genes. Crucially, among these genes is *Meis2*, which  
235 encodes a critical component for BA2 identity (Amin et al., 2015).

### 236 **HOXA2 activity is decreased in PBA**

237 The above results show that HOXA2 functions more efficiently with TALE relative to HOXA3.  
238 Given that HOXA2 is expressed in both the BA2 and in the PBA, why does HOXA2 not  
239 instruct a BA2-specific program in the PBA as well? More posterior *Hox* genes are typically  
240 able to repress the expression (and suppress the function) of more anterior genes, a  
241 process termed 'posterior prevalence' (Duboule, 2007). Indeed, *Hoxa2* highest expression is  
242 detected in the BA2, while *Hoxa2* is expressed at lower levels in *Hoxa3* main domain of

243 expression, the BA3 (Fig. 4AB and Fig. 1B). To assess how changes in HOXA2 dose affect  
244 binding genome-wide, we compared HOXA2 binding in BA2 and in PBA. While HOXA2  
245 binds similar locations in BA2 and PBA (Fig. 1H), HOXA2 binding levels are typically higher  
246 in BA2 (Fig. 4C, see also Fig. 3- Supplemental Fig. 1A). This is further confirmed by  
247 quantitative analysis of selected regions (Fig. 4D). Relative to BA2 cells, cells in the PBA  
248 display lower levels of HOXA2 and also express HOXA3 (Fig. 1B). We investigated the  
249 effect of decreasing HOXA2 levels and increasing HOXA3 levels on HOXA2 target  
250 enhancers. We found that co-expressing HOXA2 and HOXA3 reduced activation of HOXA2  
251 target enhancers *in vitro* (Fig. 4E). In conclusion, a lower dose of HOXA2 decreases HOXA2  
252 binding and activating abilities. This effect, combined with the lower efficiency of HOXA3 to  
253 activate HOXA2 targets, dampens HOXA2 transcriptional program in the PBA.

#### 254 **HOX directly cooperates with MEIS**

255 Our results indicate that HOX selectivity is displayed in concert with TALE. Generally,  
256 binding with TALE appears to be a dominant feature of HOX binding in the BAs. HOX peaks  
257 are enriched in HOX-PBX and MEIS motifs and similar to HOXA2 in BA2 (Amin et al., 2015),  
258 HOXA3 peaks overlap almost entirely with MEIS and PBX peaks in the same embryonic  
259 tissue at the same stage (Fig. 5A, Fig. 5- Supplemental Fig. 1A). We previously discovered  
260 that HOXA2 switches its transcriptional program by increasing binding of MEIS TFs to  
261 potentially lower-affinity sites across the genome (Amin et al., 2015). We investigated if  
262 HOXA3 can similarly increase MEIS binding levels. The fraction of MEIS peaks that overlaps  
263 HOXA3 binding displays higher FE in PBA, relative to the HOX-free BA1 (Fig. 5B). *Hoxa2* is  
264 also expressed in PBA, where it could be entirely responsible for the observed increase in  
265 MEIS binding. Therefore, to assess HOXA3 unique contribution to MEIS binding increase,  
266 we extracted HOXA3-specific binding. We found that MEIS peaks in PBA that overlap  
267 HOXA3 'exclusive' peaks, display higher FE (relative to MEIS non-overlapping HOX),  
268 indicating that HOXA3 also increases binding of MEIS (Fig. 5C), similar to HOXA2 in BA2  
269 (Amin et al., 2015) (FigS5). Reciprocally, co-occupancy with MEIS enhances HOXA3  
270 binding (Fig. 5D). Both HOXA2 and HOXA3 interact with MEIS1 and MEIS2 (Fig. 5E),

271 identifying direct cooperativity as the underlying mechanism. Direct cooperativity with MEIS  
272 appears to be a general operational principle of HOX TFs as, similar to HOXA2 and HOXA3,  
273 MEIS co-occupancy with HOXA1 and HOXA9 is associated with the highest MEIS binding  
274 levels in mouse embryonic stem cells (De Kumar et al., 2017) and bone marrow cells  
275 (Huang et al., 2012) respectively (Fig. 5- Supplemental Fig. 1B-D). In sum, HOX directly  
276 cooperate with TALE on chromatin. As HOXA2 and HOXA3 display sequence preferences  
277 and diverse binding affinities, HOX paralogs preferentially cooperate with distinct subsets of  
278 TALE binding events.

279 **MEIS ‘ubiquitous’ binding is converted into tissue-specific enhancer activity.**

280 MEIS TFs bind broadly and to largely overlapping locations across different BAs (Fig. 6A)  
281 (Amin et al., 2015), and only a small fraction of TALE-bound regions is occupied by HOX  
282 (Fig. 5- Supplemental Fig. 1A). HOX-MEIS cooperativity predicts that the fraction of high  
283 MEIS peaks in HOX-positive areas (BA2 and PBA), should be enriched in HOX motifs. We  
284 systematically extracted differential MEIS binding across the BAs (Fig. 6- Supplemental  
285 Fig.1) and found, using convolutional neural network (CNN) models, that differential  
286 classification of MEIS binding is sufficient to uncover HOX motif features (Phuycharoen et  
287 al., 2019); specifically, the fraction of MEIS peaks higher in BA2 and in PBA (= lower BA1) is  
288 highly enriched in sequence features matching HOX-PBX motif (Fig. 6B). Interestingly, the  
289 same CNN models identify enrichment of other TF recognition motifs in differential MEIS  
290 binding (Fig. 6B). These signature motifs reflect a differential distribution of TFs across the  
291 BAs (Fig. 6C). Moreover, CNN models detect established TF interactions (Jolma et al.,  
292 2015), as well as TF co-occupancy detected *in vivo* (Losa et al., 2017). Namely, GATA  
293 recognition motifs are enriched in higher MEIS binding in PBA, and GATA TFs are  
294 exclusively expressed in PBA (Fig. 6C), where GATA6 and MEIS bind overlapping locations.  
295 These observations suggest that other tissue-specific TFs, in addition to HOX, can affect  
296 MEIS binding to chromatin. Next, we globally quantified changes in enhancer activity across  
297 the BAs to assess the function of MEIS differential binding. Consistent with MEIS positive  
298 effects on transcription (Choe et al., 2009), regions occupied by HOXA2 in BA2, or HOXA3

299 in PBA, display higher enhancer activity when associated with increased MEIS binding  
300 levels in the same tissue (Fig. 6D). More generally, higher MEIS binding levels in a tissue  
301 are highly predictive of increased enhancer activity in the same tissue (Fig. 6E), an effect  
302 only partly explained by HOX-MEIS cooperativity (Fig. 6- Supplemental Fig. 2AB). Finally,  
303 supporting the concept that MEIS ubiquitous binding (Fig. 6A) is transformed into BA-  
304 specific enhancer activity, top MEIS binding is BA-specific and associated with distinct  
305 biological processes (Fig. 6FG and Fig. 6- Supplemental Fig. 2C). De novo motif discovery  
306 on HOXA3- and HOXA2-specific peaks identifies enrichment of distinctive sequence  
307 features of MEIS differential binding in PBA and BA2, NKX (HD) and FOX (Forkhead) motifs  
308 and basic helix-loop-helix (bHLH) recognition sites respectively (Fig. 6H), suggesting that  
309 HOX and tissue-specific TFs may collaborate in binding with TALE. We focused on FOX  
310 TFs, because *Fox* genes are typically expressed at higher levels in PBA than BA2 (Fig. 6C).  
311 Consistent with the three factors cooperating on chromatin, HOX and FOX recognition sites  
312 co-occur in the same differential MEIS peaks (Fig. 6- Supplemental Fig. 2DE). Moreover,  
313 FOXC1 binding in the BA (Amin et al., 2015) partly overlaps with HOXA2 and HOXA3  
314 binding (Fig. 6- Supplemental Fig. 2F). FOXC1, HOX and MEIS/PBX synergize to increase  
315 transcriptional activation driven by the *Sfrp2* distal region (co-occupied by HOX and FOXC1)  
316 (Fig. 6I). Interestingly, the presence of FOXC1 is sufficient to enhance MEIS/HOX  
317 transcriptional activation of *Sfrp2* enhancer, suggesting that cooperation between these TFs  
318 could partly compensate for lack of PBX (Fig. 6I). While FOXC1 display similar cooperativity  
319 with TALE and HOXA2 or HOXA3 *in vitro*, the higher levels of FOX TFs in the PBA, relative  
320 to BA2, predict FOX TFs to have stronger effects on HOXA3 and MEIS binding in PBA; this  
321 expectation is supported by the enrichment of FOX motifs in HOXA3 and MEIS differential  
322 binding in PBA, but not HOXA2 and MEIS differential binding in BA2 (Fig. 6BH). Indeed, in  
323 silico mutagenesis predicts mutations in FOX TF recognition sites to affect binding of both  
324 HOXA3 and MEIS in PBA, but not HOXA2 and MEIS in BA2 (Fig. 6J, Fig. 6- Supplemental  
325 Fig. 2G). In contrast, mutagenesis of GATA motifs (enriched in MEIS differential peaks, but  
326 not in HOX peaks) does not appear to affect HOX-MEIS binding (Fig. 6J). These results

327 identify (direct or indirect) cooperativity with tissue-specific TFs as an additional mechanism  
328 for HOX selectivity. We propose that HOX and tissue-specific TFs (alone and in  
329 combination) increase TALE TF binding affinity and residence time at selected locations,  
330 identified using their sequence recognition motifs. Increasing MEIS residence time on  
331 chromatin has a positive effect on enhancer activity and results in BA-specific transcriptional  
332 outputs. Thus, TALE TFs function as a hub which integrates different signals instructing BA  
333 morphogenesis.

334

### 335 **Discussion**

336 HOX TFs contain a HD, which display highly similar sequence recognition properties and is  
337 shared by hundreds of TFs, yet they instruct diverse, segment-specific transcriptional  
338 programs along the antero-posterior axis of all bilaterian animals. By profiling HOXA2 and  
339 HOXA3 binding in their physiological domains, we identify three main determinants of HOX-  
340 selective binding across the genome: 1) recognition of unique variants of the HOX-PBX  
341 motif; 2) differential affinity at 'shared' HOX-PBX motifs and; 3) presence of additional tissue-  
342 specific, non-TALE, TFs. These mechanisms (with the possible exception of the first) are  
343 expected to generate quantitative (rather than qualitative, i.e. binding/no binding) differences  
344 in the relative levels of HOX/TALE occupancy on commonly bound regions. Such  
345 quantitative changes are a feature of continuous networks (Biggin, 2011), in which TFs bind  
346 a continuum of functional and non-functional sites and regulatory specificities derive from  
347 quantitative differences in DNA occupancy patterns.

348 HOX paralog-selective binding occurs in cooperation with TALE. The high degree of  
349 HOX and TALE interaction flexibility, mediated by paralog-specific protein signatures, has  
350 been proposed to generate paralog-specific functions of HOX TFs (Dard et al., 2018). Here,  
351 by defining the *in vivo* repertoire of HOX occupied sites, we identify DNA sequence as an  
352 additional determinant of HOX-TALE functional specificity *in vivo*. This finding is consistent  
353 with the mechanism of latent specificity described for *Drosophila* Hox/Exd (PBX) interaction  
354 (Slattery et al., 2011) and *in vitro* observations that HOX TFs bind longer, more specific

355 sequence motifs in the presence of TALE. However, the effects of TALE on HOX binding *in*  
356 *vivo* go beyond the refinement of HOX binding sites as, at least in the BA context, binding  
357 with TALE appears to be a requirement for loading HOX on chromatin. Our observations  
358 indicate that HOXA2-A3 overwhelmingly recognize genomic sites that are enriched in HOX-  
359 PBX motifs and are also occupied by TALE TFs *in vivo*. Therefore, TALE provides a platform  
360 for HOX to bind; selectivity enables HOX paralogs to preferentially bind different subsets of  
361 this common platform. In agreement with our finding that BA-specific chromatin states do not  
362 seem to play a role in HOX target site selection, TALE platform is largely similar across BA1-  
363 2-PBA.

364         What is the functional significance of HOX-TALE interaction on chromatin and how  
365 does it contribute to paralog-specific transcriptional programs? Many examples from animal  
366 development indicate that transcriptional regulation is mediated by distinct combinations of  
367 TFs. TALE TFs operate as a hub, which assists combinatorial assembly of TF complexes.  
368 TALE platform expands HOX functional interface and enables HOX to function in concert  
369 with other TFs, bypassing the need of direct protein-protein interaction. In doing so, it  
370 integrates positional signals (encoded by HOX) and local inputs (provided by cell type-  
371 /tissue-specific TFs) into defined transcriptional outputs. While it is possible that MEIS and  
372 PBX facilitate access of diverse TFs to relatively inaccessible chromatin, MEIS TFs differ  
373 from conventional pioneer TFs, which function to open chromatin regions but are not directly  
374 involved in enhancer activation (Cirillo et al., 1998; Jacobs et al., 2018). Remarkably,  
375 independently of the type of TF involved (HOX or other tissue-specific TFs), positive  
376 changes in MEIS binding result in a functional effect, i.e. increased enhancer activity. High  
377 instances of MEIS binding are typically tissue-specific and highly correlated with enhancer  
378 activity. In fact, differential MEIS binding in a specific BAs is generally a very good predictor  
379 for matching changes in enhancer activity in the same tissue. Based on our observations  
380 and the well-established role of MEIS in transcriptional activation (Choe et al., 2009; Hau et  
381 al., 2017; Hyman-Walsh et al., 2010), we propose a model of transcriptional activation,  
382 where TALE (MEIS) TFs function as a broad or general activators and HOX paralog

383 selectivity is mainly directed at harnessing TALE functional activity at selected locations.  
384 Using their recognition motifs, HOX and/or tissue-specific TFs select specific MEIS binding  
385 locations, where they stabilize MEIS binding to generate precise functional outputs, or  
386 patterns of enhancer activation (Fig. 7). Interestingly, MEIS2 interacts with PARP1 (Hau et  
387 al., 2017), a large enzyme capable of triggering phase condensation (Altmeyer et al., 2015).  
388 Increasing MEIS residence time (as a result of the cooperation with HOX and other TFs)  
389 may favour PARP1 recruitment at selected loci and, in turn, generate the liquid-liquid phase  
390 transitions observed to promote gene activation (Boija et al., 2018; Hnisz et al., 2017).  
391 Because high instances of MEIS binding are typically associated with combinatorial TF  
392 binding, a precise identification of the critical steps for enhancer activation, and their  
393 sequential order, remains problematic. For similar reasons, MEIS and PBX shared genomic  
394 occupancy complicates dissecting their respective contributions to enhancer binding and  
395 activation. In addition to TALE, numerous other TFs are broadly, if not ubiquitously  
396 expressed during development, yet their inactivation results in tissue-specific phenotypes. It  
397 is tempting to speculate that similar principles of TF functional connectivity could explain  
398 other transcriptional networks, i.e. that cell type- tissue-specific regulators harness the  
399 activation abilities of broadly expressed TFs to generate cell type -specific gene expression  
400 programs.

401

#### 402 **Acknowledgements**

403 We thank Ian Donaldson, Andy Hayes and the other members of the Genomic  
404 Technologies, Bioinformatics and Biological Services Core Facilities at the University of  
405 Manchester. We also thank Rene Reszohazy for sharing plasmids and Samir Merabet for  
406 helpful suggestions. This work was supported by MRC grant MR/L009986/1 to NB, BBSRC  
407 grant BB/N00907X/1 to NB, MR and KM and a BBSRC studentship to ML. FL and CS were  
408 supported by NIH grant NS038183 to CS.

409

## 410 **Competing interests**

411 The authors declare no competing interests

412

## 413 **Material and methods**

### 414 **Animal experiments**

415 CD1 mice were time-mated to obtain BA2 or PBA from E115 embryos. Mouse experiments  
416 were carried out under ASPA 1986. Wild type zebrafish were raised in the University of  
417 Massachusetts Medical Center Zebrafish Facility. Embryos and adult zebrafish were  
418 maintained under standard laboratory conditions. Enhancers were amplified from mouse  
419 genomic DNA using the primers (listed in S), cloned into pCR8/GW/TOPO vector (Life  
420 Technologies) and recombined using the Gateway system (Life Technologies) to an  
421 enhancer test vector that includes a strong midbrain enhancer (Minitol2-GwB-zgata2-GFP-  
422 48, a kind gift from JL Skarmeta) as an internal control. Fertilized zebrafish embryos were  
423 collected from natural spawnings. Plasmid DNA was injected into the cytoplasm of one-cell  
424 stage embryos. Injected embryos were visualized intermittently by fluorescence microscopy  
425 up to 48 hr post fertilization to identify transgenic carriers. These were raised to adulthood,  
426 outcrossed to wildtype fish and the resulting F1 embryos were scored for GFP expression in  
427 order to generate stable transgenic lines.

### 428 **Next-generation sequencing data and downstream analyses**

429 ChIP-seq was performed as described (Losa et al., 2017) using rabbit polyclonal antibodies  
430 targeting HOXA3 (non-conserved N-terminal amino acids 24 to 180), HOXA2 (Kutejova et  
431 al., 2008), PBX1-2-3-4 (sc-25411X, Santa Cruz) and rabbit IgG (Millipore). DNA was  
432 recovered from two independent ChIP-seq experiments and purified using DiaPure columns  
433 (Diagenode). Enrichment was validated by SYBR green quantitative PCR (qPCR) using  
434 primers listed in Table S1. DNA libraries were constructed using the MicroPlex Library  
435 Preparation Kit v2 (Diagenode) and sequenced with the Illumina next generation sequencing  
436 platform. ChIP-seq experiments were analysed using Trimmomatic for trimming (Bolger et  
437 al., 2014), Bowtie2 for aligning to the mouse genome (mm9) (Langmead and Salzberg,



438 2012), samtools (Li et al., 2009) to remove the aligned reads with a mapping quality Q30  
439 and MACS2 for peak calling (Zhang et al., 2008) with default narrow peak calling setting for  
440 TFs and broad peak calling setting for histone modification marks. *'findMotifGenome'*  
441 module of the HOMER package was used to detect *de novo* motif in 200nt summit regions  
442 (Heinz et al., 2010). Venn diagrams were generated using 200nt peak summits with an  
443 overlap of at least 1nt. GREAT standard association rule settings (McLean et al., 2010) was  
444 used to associate ChIP-seq peaks with genes and uncover events controlled by TF binding.  
445 DiffBind (Ross-Innes et al., 2012) was used to re-center MEIS and H3K27ac peaks across  
446 BA1, BA2 and PBA (Figure 6\_supplemental Fig. 1) and calculate RPKM values and raw  
447 counts in the re-centered regions. edgeR generalized linear model (GLM) method with TMM  
448 normalization (Robinson et al., 2010) was used to select differential peaks and calculate fold  
449 change in MEIS binding and H3K27ac across BAs used to generate boxplots and  
450 scatterplots. The best H3K27Ac replicate [highest FRiPs (fraction of reads in peaks)] RPKM  
451 values was used to produce boxplots. Gene expression CPM values and differential gene  
452 expression at E10.5 and E11.5 were derived from (Amin et al., 2015; Losa et al., 2017).  
453 ggplot2 package (Wickham, 2016) was used to generate CPM values heatmap. GALAXY  
454 (Geocks et al 2010), Bioconductor GenomicRanges package (Lawrence et al., 2013), and  
455 Bioconductor ChIPpeakAnno package  
456 (<https://www.bioconductor.org/packages//2.10/bioc/html/ChIPpeakAnno.html>) were used to  
457 intersect, modify and visualize genomic coordinates. Bioconductor Biostring (Pagès H, 2019)  
458 was used to locate fixed motif sequences in the binding regions. Distance between HOX and  
459 MEIS binding regions was calculated using GenomicRanges package and plotted with  
460 ggplot2. The Kernel density distribution of MEIS fold enrichment in HOX binding regions vs  
461 non-HOX binding regions were calculated by R kernel density distribution estimation (R core  
462 team 2013) and plotted with ggplot2.  
463 All RNA-seq and ChIP-seq datasets are available on the ArrayExpress with accession  
464 numbers: E-MTAB-7963, E-MTAB-7966, E-MTAB-7766, E-MTAB-7767, E-MTAB-5394, E-  
465 MTAB-5407, E-MTAB-5536, E-MTAB-2696.

## 466 **Convolutional neural network models and in silico mutagenesis**

467 MEIS differential sequence features are detected by recently published differential  
468 convolutional neural network (CNN) structure (Phuycharoen et al., 2019). For in silico  
469 binding site knockout we trained a convolutional neural network (CNN) model for multitask  
470 regression of MEIS and HOX RPKM binding level. The CNN was trained by transfer  
471 learning, using convolution parameters from a previously published 1-convolutional layer  
472 MEIS RPKM model (Phuycharoen et al., 2019). Convolutional filters were transferred to a  
473 new model, which was then trained on a subset of MEIS regions also bound by HOX, to  
474 simultaneously predict log2RPKM values in 2 replicates of Hoxa2 in BA2, 2 from Hoxa3 in  
475 PBA, and one replicate of MEIS in BA1, BA2 and PBA. The training data consisted of 6795  
476 regions of 600nt with HOX binding predicted by MACS2 in any tissue. The regression model  
477 was subsequently used to predict the change in RPKM values after binding site erasure. For  
478 simulated genomic knockout, a 25nt site containing each feature was replaced by random  
479 di-nucleotides from the remaining part of the region and RPKM levels were predicted.  
480 Random replacement was repeated 100 times for each feature, averaging the predicted  
481 RPKM change. To select candidate features for erasure, MEIS PBA up-binding features  
482 were first obtained from the previously published 3-task parallel model and subsequently  
483 filtered. Sites of HOXA3 and GATA were required to contain consensus motif "TGATNNAT"  
484 and "WGATAA" respectively, with no mismatch allowed. Forkhead sites were selected  
485 based on long distinct k-mers, derived from KSM motif representation method (Guo et al.,  
486 2018), namely exact matches to any of the following sequences: "AAAATAAACA",  
487 "AAAAATAAAC", "AATAAATCAA", "ATNAATCAACA", "AAATAAACAC",  
488 "ATAAATCAAC", "GAAAATAAAC", "CAAATAAAC", "AAAATAAACT", "AAATAAACAA".  
489 These candidate sites were identified within a +/- 250nt window centred on HOXA3 and  
490 GATA6 ChIP-seq peak summits, FE of replicates was combined with edgeR (Robinson et al.  
491 2010) and a Poisson test was performed as in MACS2 using false discovery rate (FDR)  
492 cutoff = 0.05. Only Forkhead and GATA motifs that did not contain internal matches to HOX-

493 PBX motif were selected. Subsets of GATA and Forkhead sites located within +/- 100nt from  
494 a HOX-PBX sites were selected for mutagenesis.

#### 495 **Electrophoretic mobility shift assays**

496 Probes were made from primers with 5' ATO700, and purified with QIAGEN PCR purification  
497 kit (Qiagen). Proteins were generated using TnT® Quick Coupled Transcription/Translation  
498 System (Promega) and the following plasmids: pcDNA3-Hoxa2, pcDNA3-Hoxa3, pcDNA3-  
499 Meis2, containing mouse coding sequences for *Hoxa2*, *Hoxa3* and *Meis2* (isoform 1), cloned  
500 into pcDNA3 (Invitrogen); pcDNA3-PBX1a is a gift from Francesco Blasi. Reactions (4%  
501 Ficoll, 20mM HEPES, 37.5mM KCl, 1mM DTT, 0.1mM EDTA, 2ug Poly dI.dC, 16ng probe,  
502 and 2ul of TNT extracts in total volume of 10ul) were mixed by gentle flicking, and incubated  
503 at room temperature for 12 minutes before being run on 3% / 4% acrylamide gel at 70V in  
504 0.5X TBE.

#### 505 **Luciferase assay**

506 *Meis2* and *Zfp703* enhancers were amplified from mouse genomic DNA using primers listed  
507 in Table S1 cloned into pCR8/GW/TOPO vector (Life Technologies) and recombined using  
508 the Gateway system (Life Technologies) into pGL4.23-GW (a gift from Jorge Ferrer;  
509 Addgene plasmid # 60323; <http://n2t.net/addgene:60323> ; RRID:Addgene\_60323).  
510 Enhancers were co-transfected with pcDNA3, pcDNA3-Hoxa2, pcDNA3-Hoxa3, pcDNA3-  
511 Meis2, pcDNA3-PBX1a (described above) and pcDNA3-Hoxd3 generated by GenScript.  
512 NIH3T3 cells were grown in DMEM (D6429) supplemented with 10% FBS and 5%  
513 penicillin/streptomycin, and seeded in 24-well plates at 100,000 cells/ml. Cells were  
514 transfected with GeneJuice Transfection Reagent (Novagen), using 250ng luciferase  
515 plasmid and 300ng pcDNA3 plasmids per well. Cells were harvested 24 hours after  
516 transfection and luciferase measured using Luciferase Assay System and the GloMax Multi-  
517 Detection System (Promega).

#### 518 **Antibody validation**

519 Gateway® entry vectors for mouse *Hoxb1* and *Hoxb2* (Bridoux & al. 2015 PubMed PMID:  
520 26303204), human *HOXA3* and *HOXC4* (<http://horfdb.dfci.harvard.edu/hv7/>) were used to

521 generate mammalian expression vectors for FLAG-HOX (v1899 destination vector) using the  
522 gateway technology (Barrios-Rodiles et al., 2005). Gateway® expression vectors for  
523 pExpFLAG-Hoxa1 and pExpFLAG-Hoxa2 are described in (Bergiers et al., 2013; Lambert et  
524 al., 2012). HEK293 cells were grown at 37°C, in a humidified atmosphere with 5% CO<sub>2</sub> in  
525 DMEM (D6429) supplemented with 10% FBS, 5% penicillin/streptomycin, and 5% L-  
526 glutamine. Cells were seeded in 6-well plates at 400,000 cells/well and transfected 24 hours  
527 after plating using 1µg of HOX plasmid constructs and Fugene6 (Promega) according to the  
528 manufacturer's instructions. Proteins were collected 48 hours after transfection, boiled in  
529 Laemmli buffer, run on SDS-page and visualized using anti-FLAG (M2) (#F1804, Sigma),  
530 HRP-conjugated anti-β-ACTIN (#A3854, Sigma) and anti-Hoxa3 antibody (1:2000) and  
531 HRP- HRP-conjugated secondary antibodies.

#### 532 **Co-immunoprecipitation experiments**

533 Coding sequences for MEIS1b and MEIS2.1 were cloned in pEnt plasmids, confirmed by  
534 DNA sequencing and used to generate pExp mammalian expression vectors for GST-  
535 tagged proteins with the pDest-GST N-terminal destination vector using the gateway  
536 technology (Rual et al., 2005). HEK293 cells were transfected as above, using 500ng each  
537 of FLAG/GST constructs per well. Proteins were collected 48 hours after transfection and  
538 co-precipitation performed as described in (Bridoux et al., 2015).

539

#### 540 **References**

541 Altmeyer, M., Neelsen, K.J., Teloni, F., Pozdnyakova, I., Pellegrino, S., Grofte, M., Rask,  
542 M.D., Streicher, W., Jungmichel, S., Nielsen, M.L., *et al.* (2015). Liquid demixing of  
543 intrinsically disordered proteins is seeded by poly(ADP-ribose). *Nat Commun* 6, 8088.  
544 Amin, S., Donaldson, I.J., Zannino, D.A., Hensman, J., Rattray, M., Losa, M., Spitz, F.,  
545 Ladam, F., Sagerstrom, C., and Bobola, N. (2015). Hoxa2 Selectively Enhances Meis  
546 Binding to Change a Branchial Arch Ground State. *Dev Cell* 32, 265-277.

547 Barrios-Rodiles, M., Brown, K.R., Ozdamar, B., Bose, R., Liu, Z., Donovan, R.S., Shinjo, F.,  
548 Liu, Y., Dembowy, J., Taylor, I.W., *et al.* (2005). High-throughput mapping of a dynamic  
549 signaling network in mammalian cells. *Science* 307, 1621-1625.

550 Bergiers, I., Bridoux, L., Nguyen, N., Twizere, J.C., and Rezsóhazy, R. (2013). The  
551 homeodomain transcription factor *Hoxa2* interacts with and promotes the proteasomal  
552 degradation of the E3 ubiquitin protein ligase RCHY1. *Plos One* 8, e80387.

553 Biggin, M.D. (2011). Animal transcription networks as highly connected, quantitative  
554 continua. *Dev Cell* 21, 611-626.

555 Bobola, N., and Merabet, S. (2017). Homeodomain proteins in action: similar DNA binding  
556 preferences, highly variable connectivity. *Curr Opin Genet Dev* 43, 1-8.

557 Boija, A., Klein, I.A., Sabari, B.R., Dall'Agnesse, A., Coffey, E.L., Zamudio, A.V., Li, C.H.,  
558 Shrinivas, K., Manteiga, J.C., Hannett, N.M., *et al.* (2018). Transcription Factors Activate  
559 Genes through the Phase-Separation Capacity of Their Activation Domains. *Cell* 175, 1842-  
560 1855 e1816.

561 Bolger, A.M., Lohse, M., and Usadel, B. (2014). Trimmomatic: a flexible trimmer for Illumina  
562 sequence data. *Bioinformatics* 30, 2114-2120.

563 Bridoux, L., Bergiers, I., Draime, A., Halbout, M., Deneyer, N., Twizere, J.C., and  
564 Rezsóhazy, R. (2015). KPC2 relocalizes HOXA2 to the cytoplasm and decreases its  
565 transcriptional activity. *Biochim Biophys Acta* 1849, 1298-1311.

566 Burglin, T.R., and Affolter, M. (2016). Homeodomain proteins: an update. *Chromosoma* 125,  
567 497-521.

568 Choe, S.K., Lu, P., Nakamura, M., Lee, J., and Sagerstrom, C.G. (2009). Meis cofactors  
569 control HDAC and CBP accessibility at Hox-regulated promoters during zebrafish  
570 embryogenesis. *Dev Cell* 17, 561-567.

571 Cirillo, L.A., McPherson, C.E., Bossard, P., Stevens, K., Cherian, S., Shim, E.Y., Clark, K.L.,  
572 Burley, S.K., and Zaret, K.S. (1998). Binding of the winged-helix transcription factor HNF3 to  
573 a linker histone site on the nucleosome. *Embo J* 17, 244-254.

574 Creighton, M.P., Cheng, A.W., Welstead, G.G., Kooistra, T., Carey, B.W., Steine, E.J.,  
575 Hanna, J., Lodato, M.A., Frampton, G.M., Sharp, P.A., *et al.* (2010). Histone H3K27ac  
576 separates active from poised enhancers and predicts developmental state. *Proc Natl Acad*  
577 *Sci U S A* 107, 21931-21936.

578 Cumberworth, A., Lamour, G., Babu, M.M., and Gsponer, J. (2013). Promiscuity as a  
579 functional trait: intrinsically disordered regions as central players of interactomes. *Biochem J*  
580 454, 361-369.

581 Dard, A., Reboulet, J., Jia, Y., Bleicher, F., Duffraisse, M., Vanaker, J.M., Forcet, C., and  
582 Merabet, S. (2018). Human HOX Proteins Use Diverse and Context-Dependent Motifs to  
583 Interact with TALE Class Cofactors. *Cell Rep* 22, 3058-3071.

584 De Kumar, B., Parker, H.J., Paulson, A., Parrish, M.E., Pushel, I., Singh, N.P., Zhang, Y.,  
585 Slaughter, B.D., Unruh, J.R., Florens, L., *et al.* (2017). HOXA1 and TALE proteins display  
586 cross-regulatory interactions and form a combinatorial binding code on HOXA1 targets.  
587 *Genome Res* 27, 1501-1512.

588 Donaldson, I.J., Amin, S., Hensman, J.J., Kutejova, E., Rattray, M., Lawrence, N., Hayes, A.,  
589 Ward, C.M., and Bobola, N. (2012). Genome-wide occupancy links Hoxa2 to Wnt-beta-  
590 catenin signaling in mouse embryonic development. *Nucleic Acids Res* 40, 3990-4001.

591 Duboule, D. (2007). The rise and fall of Hox gene clusters. *Development* 134, 2549-2560.

592 Farley, E.K., Olson, K.M., Zhang, W., Brandt, A.J., Rokhsar, D.S., and Levine, M.S. (2015).  
593 Suboptimization of developmental enhancers. *Science* 350, 325-328.

594 Gendron-Maguire, M., Mallo, M., Zhang, M., and Gridley, T. (1993). Hoxa-2 mutant mice  
595 exhibit homeotic transformation of skeletal elements derived from cranial neural crest. *Cell*  
596 75, 1317-1331.

597 Guo, Y., Tian, K., Zeng, H., Guo, X., and Gifford, D.K. (2018). A novel k-mer set memory  
598 (KSM) motif representation improves regulatory variant prediction. *Genome Res* 28, 891-  
599 900.

600 Hau, A.C., Grebbin, B.M., Agoston, Z., Anders-Maurer, M., Muller, T., Gross, A., Kolb, J.,  
601 Langer, J.D., Doring, C., and Schulte, D. (2017). MEIS homeodomain proteins facilitate  
602 PARP1/ARTD1-mediated eviction of histone H1. *J Cell Biol* 216, 2715-2729.

603 Heinz, S., Benner, C., Spann, N., Bertolino, E., Lin, Y.C., Laslo, P., Cheng, J.X., Murre, C.,  
604 Singh, H., and Glass, C.K. (2010). Simple combinations of lineage-determining transcription  
605 factors prime cis-regulatory elements required for macrophage and B cell identities. *Mol Cell*  
606 38, 576-589.

607 Hnisz, D., Shrinivas, K., Young, R.A., Chakraborty, A.K., and Sharp, P.A. (2017). A Phase  
608 Separation Model for Transcriptional Control. *Cell* 169, 13-23.

609 Huang, Y., Sitwala, K., Bronstein, J., Sanders, D., Dandekar, M., Collins, C., Robertson, G.,  
610 MacDonald, J., Cezard, T., Bilenky, M., *et al.* (2012). Identification and characterization of  
611 Hoxa9 binding sites in hematopoietic cells. *Blood* 119, 388-398.

612 Hyman-Walsh, C., Bjerke, G.A., and Wotton, D. (2010). An autoinhibitory effect of the  
613 homothorax domain of Meis2. *FEBS J* 277, 2584-2597.

614 Jacobs, J., Atkins, M., Davie, K., Imrichova, H., Romanelli, L., Christiaens, V., Hulselmans,  
615 G., Potier, D., Wouters, J., Taskiran, I., *et al.* (2018). The transcription factor Grainy head  
616 primes epithelial enhancers for spatiotemporal activation by displacing nucleosomes. *Nat*  
617 *Genet* 50, 1011-1020.

618 Jolma, A., Yin, Y., Nitta, K.R., Dave, K., Popov, A., Taipale, M., Enge, M., Kivioja, T.,  
619 Morgunova, E., and Taipale, J. (2015). DNA-dependent formation of transcription factor  
620 pairs alters their binding specificity. *Nature* 527, 384-388.

621 Krumlauf, R. (1994). Hox genes in vertebrate development. *Cell* 78, 191-201.

622 Kutejova, E., Engist, B., Self, M., Oliver, G., Kirilenko, P., and Bobola, N. (2008). Six2  
623 functions redundantly immediately downstream of Hoxa2. *Development* 135, 1463-1470.

624 Lambert, B., Vandeputte, J., Remacle, S., Bergiers, I., Simonis, N., Twizere, J.C., Vidal, M.,  
625 and Rezsöházy, R. (2012). Protein interactions of the transcription factor Hoxa1. *Bmc Dev*  
626 *Biol* 12.

- 627 Langmead, B., and Salzberg, S.L. (2012). Fast gapped-read alignment with Bowtie 2. *Nature*  
628 *methods* 9, 357-359.
- 629 Lawrence, M., Huber, W., Pages, H., Aboyoun, P., Carlson, M., Gentleman, R., Morgan,  
630 M.T., and Carey, V.J. (2013). Software for computing and annotating genomic ranges. *PLoS*  
631 *Comput Biol* 9, e1003118.
- 632 Li, H., Handsaker, B., Wysoker, A., Fennell, T., Ruan, J., Homer, N., Marth, G., Abecasis,  
633 G., Durbin, R., and Genome Project Data Processing, S. (2009). The Sequence  
634 Alignment/Map format and SAMtools. *Bioinformatics* 25, 2078-2079.
- 635 Losa, M., Latorre, V., Andrabi, M., Ladam, F., Sagerstrom, C., Novoa, A., Zarrineh, P.,  
636 Bridoux, L., Hanley, N.A., Mallo, M., *et al.* (2017). A tissue-specific, Gata6-driven  
637 transcriptional program instructs remodeling of the mature arterial tree. *Elife* 6.
- 638 Manley, N.R., and Capecchi, M.R. (1995). The role of Hoxa-3 in mouse thymus and thyroid  
639 development. *Development* 121, 1989-2003.
- 640 Manley, N.R., and Capecchi, M.R. (1997). Hox group 3 paralogous genes act synergistically  
641 in the formation of somitic and neural crest-derived structures. *Dev Biol* 192, 274-288.
- 642 McLean, C.Y., Bristor, D., Hiller, M., Clarke, S.L., Schaar, B.T., Lowe, C.B., Wenger, A.M.,  
643 and Bejerano, G. (2010). GREAT improves functional interpretation of cis-regulatory regions.  
644 *Nat Biotechnol* 28, 495-501.
- 645 Merabet, S., and Mann, R.S. (2016). To Be Specific or Not: The Critical Relationship  
646 Between Hox And TALE Proteins. *Trends Genet* 32, 334-347.
- 647 Mirny, L.A. (2010). Nucleosome-mediated cooperativity between transcription factors. *Proc*  
648 *Natl Acad Sci U S A* 107, 22534-22539.
- 649 Moyle-Heyrman, G., Tims, H.S., and Widom, J. (2011). Structural constraints in collaborative  
650 competition of transcription factors against the nucleosome. *Journal of molecular biology*  
651 412, 634-646.
- 652 Noyes, M.B., Christensen, R.G., Wakabayashi, A., Stormo, G.D., Brodsky, M.H., and Wolfe,  
653 S.A. (2008). Analysis of homeodomain specificities allows the family-wide prediction of  
654 preferred recognition sites. *Cell* 133, 1277-1289.



- 655 Pagès H, A.P., Gentleman R, DebRoy S (2019). Biostrings: Efficient manipulation of  
656 biological strings.
- 657 Pearson, J.C., Lemons, D., and McGinnis, W. (2005). Modulating Hox gene functions during  
658 animal body patterning. *Nat Rev Genet* 6, 893-904.
- 659 Porcelli, D., Fischer, B., Russell, S., and White, R. (2019). Chromatin accessibility plays a  
660 key role in selective targeting of Hox proteins. *Genome Biol* 20, 115.
- 661 Phuycharoen, M., Zarrineh, P., Bridoux, L., Amin, S., Losa, M., Chen, K., Bobola, N., and  
662 Rattray, M. (2019). Uncovering tissue-specific binding features from differential deep  
663 learning.
- 664 Reiter, F., Wienerroither, S., and Stark, A. (2017). Combinatorial function of transcription  
665 factors and cofactors. *Curr Opin Genet Dev* 43, 73-81.
- 666 Rezsóhazy, R., Saurin, A.J., Maurel-Zaffran, C., and Graba, Y. (2015). Cellular and  
667 molecular insights into Hox protein action. *Development* 142, 1212-1227.
- 668 Rijli, F.M., Mark, M., Lakkaraju, S., Dierich, A., Dolle, P., and Chambon, P. (1993). A  
669 homeotic transformation is generated in the rostral branchial region of the head by disruption  
670 of *Hoxa-2*, which acts as a selector gene. *Cell* 75, 1333-1349.
- 671 Robinson, M.D., McCarthy, D.J., and Smyth, G.K. (2010). edgeR: a Bioconductor package  
672 for differential expression analysis of digital gene expression data. *Bioinformatics* 26, 139-  
673 140.
- 674 Ross-Innes, C.S., Stark, R., Teschendorff, A.E., Holmes, K.A., Ali, H.R., Dunning, M.J.,  
675 Brown, G.D., Gojis, O., Ellis, I.O., Green, A.R., *et al.* (2012). Differential oestrogen receptor  
676 binding is associated with clinical outcome in breast cancer. *Nature* 481, 389-393.
- 677 Rual, J.F., Venkatesan, K., Hao, T., Hirozane-Kishikawa, T., Dricot, A., Li, N., Berriz, G.F.,  
678 Gibbons, F.D., Dreze, M., Ayivi-Guedehoussou, N., *et al.* (2005). Towards a proteome-scale  
679 map of the human protein-protein interaction network. *Nature* 437, 1173-1178.
- 680 Selleri, L., Zappavigna, V., and Ferretti, E. (2019). 'Building a perfect body': control of  
681 vertebrate organogenesis by PBX-dependent regulatory networks. *Genes Dev* 33, 258-275.

682 Slattery, M., Riley, T., Liu, P., Abe, N., Gomez-Alcala, P., Dror, I., Zhou, T., Rohs, R., Honig,  
683 B., Bussemaker, H.J., *et al.* (2011). Cofactor binding evokes latent differences in DNA  
684 binding specificity between Hox proteins. *Cell* 147, 1270-1282.

685 Spitz, F., and Furlong, E.E. (2012). Transcription factors: from enhancer binding to  
686 developmental control. *Nat Rev Genet* 13, 613-626.

687 Staby, L., O'Shea, C., Willemoes, M., Theisen, F., Kragelund, B.B., and Skriver, K. (2017).  
688 Eukaryotic transcription factors: paradigms of protein intrinsic disorder. *Biochem J* 474,  
689 2509-2532.

690 Tsai, A., Muthusamy, A.K., Alves, M.R., Lavis, L.D., Singer, R.H., Stern, D.L., and Crocker,  
691 J. (2017). Nuclear microenvironments modulate transcription from low-affinity enhancers.  
692 *Elife* 6.

693 Wickham (2016). *Elegant Graphics for Data Analysis* (Springer).

694 Zhang, Y., Liu, T., Meyer, C.A., Eeckhoute, J., Johnson, D.S., Bernstein, B.E., Nusbaum, C.,  
695 Myers, R.M., Brown, M., Li, W., *et al.* (2008). Model-based analysis of ChIP-Seq (MACS).  
696 *Genome Biol* 9, R137.

697

## 698 **Figure legends**

699 **Figure 1. HOXA2 and HOXA3 control diverse processes by targeting different regions**  
700 **of the genome *in vivo*.** A. BA organization in mammals. BA3-6 are collectively indicated as  
701 PBA. The same colour code (BA2 red, PBA green) is used throughout the manuscript. B.  
702 Heatmap of *Hox* expression in E10.5 mouse BA1, BA2 and PBA, based on the normalized  
703 expression values count per million (CPM)(Losa et al., 2017). C. Overlap of HOXA3 binding  
704 in PBA and HOXA2 binding in BA2 (200 nt summits, overlap at least 1 nt). Only peaks with  
705  $FE \geq 10$  are considered. D. UCSC tracks (mm9) of HOXA3 (green) and HOXA2 (red) specific  
706 and shared peaks. E. Overlap (%) of increasing numbers of top HOXA2 and HOXA3 peaks  
707 (ranked by FE). High-confidence peaks show the smallest overlap. FG. GREAT analysis of  
708 HOXA3- (F) and HOXA2- (G) specific peaks (non-overlapping, green and red bars  
709 respectively) shows association with genes involved in different biological processes and

710 whose mutations generate different phenotypes in mouse. The length of the bars  
711 corresponds to the binomial raw (uncorrected) P-values (x-axis values). H. HOXA2 binding  
712 in PBA. Overlap of HOXA2 summit regions in PBA ( $FE \geq 10$ , green) with HOXA2 summit  
713 regions in the BA2 (red) and HOXA3 summit regions in the PBA (green); same rule as in C.  
714 HOXA2 binding locations are similar in BA2 and PBA.

715 **Figure 2. HOXA2 and HOXA3 select variants of the HOX/PBX motif.** A. Homer detects  
716 different variants of the HOX-PBX motif in top 250 HOXA2 and HOXA3 peaks, with a G/C  
717 (HOXA3) or mainly a G (HOXA2) in the second variable position. B. Occurrence of HOX-  
718 PBX motif variants (all permutations of the variable nucleotides in TGATNNAT) in top 250  
719 HOXA2 and HOXA3 peaks (ordered into 50 region bins). The TGATTCAT motif (red arrows)  
720 is among the most enriched variants in HOXA3 peaks but does not virtually occur in HOXA2  
721 peaks. C. Box plot of global H3K27 acetylation levels (PBA/BA2 ratio) at HOXA3 peaks  
722 containing different TGATNNAT variants. HOXA3 peaks containing the TGATTCAT variant  
723 are associated with increased enhancer activity in PBA (red line). D. UCSC tracks with  
724 HOXA3, HOXA2, PBX and MEIS binding profiles in BA2 (red) and PBA (green) at the *Sulf2*  
725 locus, containing TGATTCAT. No HOXA2 binding is detected in BA2 or PBA. E. Sequence  
726 of HOXA3 peak summit in D, corresponding to the probe used in F. The TGATTCAT motif  
727 (underlined) is flanked by two MEIS motifs (also underlined); the C→G substitution tested in  
728 G is indicated in red. F. HOXA3 can selectively bind the *Sulf2* probe in complex with  
729 PBX/MEIS. Incubation of the *Sulf2* probe with TNT reticulocyte expressing HOXA2, HOXA3,  
730 MEIS/PBX, HOXA2/MEIS/PBX or HOXA3/MEIS/PBX. MEIS/PBX bind the *Sulf2* probe in  
731 combination (arrow). Addition of HOXA3 to the probe results in the formation of a complex  
732 only in the presence of PBX/MEIS (arrow). No complex is formed when PBX/MEIS are co-  
733 translated with HOXA2. G. Same experiment as in F, using a mutant *Sulf2* probe (the  
734 nucleotide substitution is shown in E). HOXA2 can bind the mutant probe in combination  
735 with MEIS/PBX (asterisk), similar to HOXA3 (arrow).

736 **Figure 3. HOXA2 control of target enhancers.** A. UCSC tracks of HOXA2, HOXA3, PBX,  
737 MEIS binding and H3K27 acetylation profiles in BA2 (red) and PBA (green) at the *Meis2*

738 locus. Strong HOX and TALE binding is observed in both tissues, with higher acetylation  
739 levels in BA2. B. Heatmap shows *Meis2* and *Zfp703* expression in E11.5 mouse BA1, BA2  
740 and PBA, based on the normalized expression values CPM (Losa et al., 2017). C. *Meis2*  
741 enhancer is active in the hindbrain (h) and the BAs (ba, arrow) of developing zebrafish,  
742 which correspond to *Meis2* expression domains in mouse (Amin et al., 2015). The enhancer  
743 sequence spans the 200nt summit of HOXA2 peak in A. D. Luciferase activity driven by  
744 *Meis2* enhancer co-transfected with *Hoxa2* (red bar) or *Hoxa3* (green bar) in combination  
745 with *Meis2* and *Pbx1a* expression vectors in NIH3T3 cells. The combination of *Hoxa2* with  
746 *Meis2* and *Pbx1a* results in the highest activation. Changing the HOX-PBX site (empty bars,  
747 mutant sequence in F) reduces HOX-TALE activation. E. Luciferase activity driven by *Meis2*  
748 enhancer co-transfected with *Hoxa2-a3HD* (red empty bar) or *Hoxa3-a2HD* (green empty  
749 bar) and *Meis2* and *Pbx1a*. Values shown in DE represent fold activation over basal  
750 enhancer activity and are presented as the average of at least two independent  
751 experiments, each performed in triplicate. Error bars represent the standard error of the  
752 mean (SEM). F. Sequence of *Meis2* wild-type and mutant probe. HOX-PBX (reverse) and  
753 MEIS motifs are underlined. Nucleotide substitution in the HOX-PBX site are shown in red.  
754 G-J. Incubation of the *Meis2* probe with TNT reticulocyte expressing HOXA2, HOXA3,  
755 MEIS/PBX, HOXA2/MEIS/PBX or HOXA3/MEIS/PBX as indicated. G-H. HOXA2 (G, red  
756 arrow) and HOXA3 (H, green arrow) weakly bind the *Meis2* probe. MEIS and PBX bind DNA  
757 together (black arrow). Addition of HOXA2 results in a trimeric protein complex (arrowhead);  
758 the intensity of the MEIS/PBX complex is reduced (black arrow). Addition of HOXA3 results  
759 in a higher complex (arrowhead), but without affecting the intensity of the MEIS/PBX dimeric  
760 complex (black arrow). I. Swapping HOXA3-HD with HOXA2-HD does not improve the ability  
761 of HOXA3 to form a ternary complex with PBX and MEIS, and does not decrease HOXA2  
762 binding with MEIS and PBX (arrowheads). Adding HOXA2 (or HOXA2-A3HD) results in  
763 higher intensity of the trimeric complex and lower intensity of TALE dimeric complex relative  
764 to HOXA3 (or HOXA3-A2HD), as observed in G-H. J. *Meis2* mutant probe (sequence in F)  
765 does not interact with HOX and/or TALE. K. Top HOXA2 and HOXA3 overlapping peaks

766 (total of 60 intersecting top 250 HOXA2 and HOXA3 peaks) are more frequently associated  
767 with genes with higher expression in BA2 (red) relative to PBA (green). The white portion of  
768 the pie chart refers to genes that are not differentially expressed (no DE). Gene association  
769 is based on GREAT standard association rules; expression levels are extracted from E11.5  
770 RNA-seq (Losa et al., 2017).

771 **Figure 4.** AB. *In situ* hybridization on E9.5 embryos, using *Hoxa2* (A) and *Hoxa3* (B) probes.  
772 A. *Hoxa2* is highly expressed in the neural crest migrating from rhombomere 4 (asterisk) to  
773 the BA2 (arrow). The portion of neural crest migrating just below the otic vesicle (OV) into  
774 the BA3 (arrowhead) is also *Hoxa2*-positive. B. *Hoxa3* is expressed in the BA3 (arrowhead).  
775 C. Boxplots of FE of HOXA2 peaks in BA2 and PBA. D. Comparison of HOXA2 binding in  
776 BA2 (red bars) and PBA (green bars) by ChIP-qPCR. Enrichment of each region following  
777 immunoprecipitation with HOXA2 and IgG negative control antibody (Neg Ab) is calculated  
778 as percentage input; numbers indicate the corresponding FE values in HOXA2 ChIP-seq  
779 (BA2 and PBA). Peaks are labelled by their closest genes. *Itih4* is a negative control  
780 (unbound region). Values represent the average of duplicate samples, and error bars  
781 indicate the SEM. D. Luciferase activity driven by *Meis2* and *Zfp703* enhancers co-  
782 transfected with expression vector for *Hoxa2* or *Hoxa3*, alone, or at diverse ratio of *Hoxa2* to  
783 *Hoxa3* (3:1; 2:2; 1:3) as indicated. All samples, except the negative control, contain *Hox* in in  
784 combination with *Meis2* and *Pbx1a* expression vectors. For both enhancers, luciferase  
785 activity decreases as *Hoxa2* is progressively replaced by *Hoxa3*. Values represent fold  
786 activation over basal enhancer activity and are presented as the average of at least two  
787 independent experiments, each performed in triplicate. Error bars represent the SEM.

788 **Figure 5. HOX directly cooperate with MEIS.** A. Overlap of HOXA3 with MEIS and PBX  
789 peaks in the same tissue (PBA) and at the same embryonic stage (E11.5) (200nt summit  
790 regions, overlap at least 1nt). The proportional Venn diagram is cropped to focus on HOXA3  
791 peaks. B. Barplots of fold change in MEIS binding levels in PBA versus BA1. Regions co-  
792 occupied by MEIS with HOXA3 in PBA generally display higher MEIS binding levels in PBA  
793 (HOX-positive) relative to the HOX-negative BA1. In contrast, MEIS binding not overlapping

794 HOXA3 can be higher in BA1 or in PBA. Fold changes were calculated using EdgeR (see  
795 also Figure 6- figure Supplement 1). C. Kernel density plots of MEIS peaks relative to FE  
796 (PBA). MEIS binding is sorted into peaks not overlapping HOX (light green), MEIS peaks  
797 overlapping HOXA3 only ('exclusive' peaks, i.e. not overlapping HOXA2 in PBA, darker  
798 green) and MEIS peaks overlapping HOXA2 and HOXA3 (darkest green). D. Distance of  
799 HOXA3 peaks relative to MEIS peaks (PBA). HOXA3 peaks are binned according to their  
800  $\log_{10}$  distance to the nearest MEIS peak and labelled according to FE (high FE, dark red  
801 bars; low FE, dark blue bars). E. Co-immunoprecipitation assays. HEK293T cells were co-  
802 transfected with expression vectors for FLAG-tagged HOXA2 or HOXA3 and GST-tagged  
803 MEIS1, GST-tagged MEIS2 or GST alone. Protein interactions were assayed by co-  
804 immunoprecipitation on glutathione beads directed toward the GST tag and eluted proteins  
805 analysed by western blotting to detect the presence of HOXA2-FLAG or HOXA3-FLAG (red  
806 box, Co-IP). Cell lysates were analysed by western blotting prior to co-immuno precipitation  
807 to detect protein expression (input).

808 **Figure 6.** A. Proportional Venn diagram shows highly overlapping binding of MEIS in BA1,  
809 BA2 and PBA. Out of 215830 MEIS peaks, 101055 are in common between the three  
810 tissues; MEIS peaks were combined and re-centered using DiffBind. B. CNN models of  
811 MEIS differential peaks uncover enrichment of tissue-specific sequence motifs as described  
812 in (Phuycharoen et al., 2019). MEIS binding was classified in six categories (i.e. peaks with  
813 higher/lower binding in BA1, BA2, PBA). CNN analysis identifies tissue-specific sequence  
814 features in each class of MEIS peaks. Predicted GATA binding in a MEIS PBA up-binding  
815 region is visualised as in the example (a feature matching GATA TF recognition motif on  
816 chr5:104257972-104258015 is shown) and annotated using HOMER. The GATA6 ChIP-seq  
817 verifies this prediction. HOMER was used to cluster and annotate tissue-specific sequence  
818 features; differentially enriched features are matched to TF families with known tissue-  
819 specificity (see also Fig. 6C). C. Heatmap of the expression of selected TF families,  
820 corresponding to cognate recognition motifs identified in MEIS PBA-up, in E11.5 mouse BA2  
821 and PBA. Members of the GATA and TBX families, and the majority of expressed Forkhead

822 TFs are enriched in PBA relative to BA2. Only TFs with expression values > 10 cpm in at  
823 least one tissue are shown. D. Boxplots of the ratio of H3K27ac ( $\log_2$ RPKM) in BA2 and PBA  
824 for all HOX peaks and for HOX peaks overlapping MEIS differential binding higher in BA2  
825 (HOXA2 peaks) and higher in PBA (HOXA3 peaks). HOX binding generally increases  
826 H3K27Ac; peaks associated with increased MEIS binding display a higher increment of  
827 H3K27Ac in the same tissue. E. Correlation plot of differential MEIS binding and differential  
828 acetylation (enhancer activity) at intergenic regions (PBA versus BA2). Each point  
829 corresponds to a region with MEIS  $\log_2$  fold change >1 (FC>2); the corresponding H3K27ac  
830 value is plotted. Changes in MEIS binding levels are positively correlated with increased  
831 enhancer activity in the same tissue (correlation = 0.73). F. Different top MEIS peaks are  
832 observed in different BAs. The ratio of MEIS peaks, which are common to BA2 and PBA,  
833 increases as FE decreases. G. UCSC tracks illustrates MEIS increased binding at the  
834 *Zfp496* and *Zfpm1* loci. Instances of common MEIS peaks higher in one tissue (PBA) are  
835 shaded. H. HOMER de novo motif discovery in HOXA3-specific and HOXA2-specific peaks.  
836 HOXA3-specific are HOXA3 peaks excluding peaks overlapping with HOXA2 BA2; similarly,  
837 HOXA2-specific are HOXA2 peaks excluding peaks overlapping with HOXA3 PBA. HOMER  
838 identifies enrichment of the same motifs enriched in BA-specific MEIS differential binding,  
839 Forkhead motif in HOXA3-specific (shaded in green) and BHLH motif in HOXA2-specific  
840 subsets (shaded in red). Variations of HD recognition motifs potentially recognized by HOX  
841 and attributed by HOMER to PBA-specific TFs NKX and ISL1 in PBA and LHX/DLX in BA2  
842 are also enriched. I. Luciferase activity driven by *Sfrp2* enhancer co-transfected with *Meis*,  
843 and *Meis* and *Pbx* with and without *Hoxa2* (red empty bars), *Hoxa3* (green empty bars) and  
844 *Foxc1* (grey) in 3T3 cells. Adding *Foxc1* to *Hoxa2* or *Hoxa3* with *Meis2* and *Pbx1a* results in  
845 the highest activation. J. In silico knockout of Forkhead and GATA motifs is used to predict  
846 the effects on HOX and MEIS binding. CNN MEIS PBA 'up-binding' features (Fig. 6B) were  
847 annotated as HOX, GATA, and Forkhead (see methods). Co-occurring HOX- Forkhead  
848 motifs (distance between 1 nt to 100 nt) were selected for in silico mutagenesis. Forkhead  
849 mutagenesis results in a significant drop in HOXA3 binding in PBA, but shows no average

850 significant effect on HOXA2 in BA2. Similarly, Forkhead mutagenesis significantly decreases  
851 Meis PBA binding across most tested sites. In comparison, much weaker effects are  
852 predicted on BA1 and BA2 MEIS differential binding. As a negative control, the same  
853 procedure was applied to co-occurring HOX-GATA motifs. GATA motif mutagenesis does  
854 not show significant average effects on HOX, or MEIS in HOX-bound regions.

855 **Figure 7. Model.** Low affinity, widespread binding of MEIS (blue square) defines a large  
856 subset of accessible chromatin (grey line) for activation (PBX is not shown as PBX and  
857 MEIS binding almost entirely overlaps). Direct cooperativity with HOX (A2 and A3, red and  
858 green circles respectively) and/or indirect cooperativity with tissue-specific TFs (triangle)  
859 increase MEIS binding affinity and residence time; prolonged residence time of MEIS at  
860 enhancers promotes recruitment of general co-activators (yellow) and activation of  
861 transcription. HOX paralogs preferentially bind different subsets of MEIS occupied regions,  
862 resulting in differential transcription. Three examples of BA-specific transcription are shown.  
863 In **a**, the red site is bound with higher affinity by HOXA2 than HOXA3, resulting in the  
864 formation of a more stable HOX-TALE complex on DNA and a (higher) transcriptional output  
865 in BA2. Conversely, in **c**, the green site is only recognized by HOXA3, leading to high affinity  
866 MEIS binding only in PBA, and to PBA-specific transcription. In **b**, the effect of HOXA3 is  
867 potentiated by a PBA-specific TF binding in the vicinity. Co-binding with tissue-specific TFs  
868 may positively contribute to HOX-MEIS cooperativity by competing with nucleosome for DNA  
869 binding, especially at HOX and/or MEIS low affinity sites. These mechanisms result in BA-  
870 specific transcription.

871



**Figure 1**

**A**

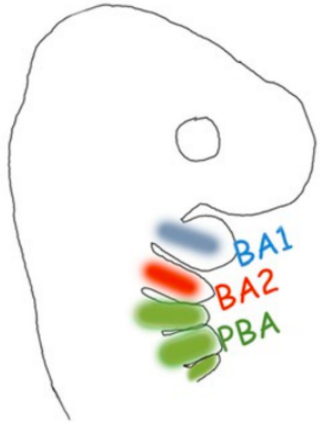

**B**

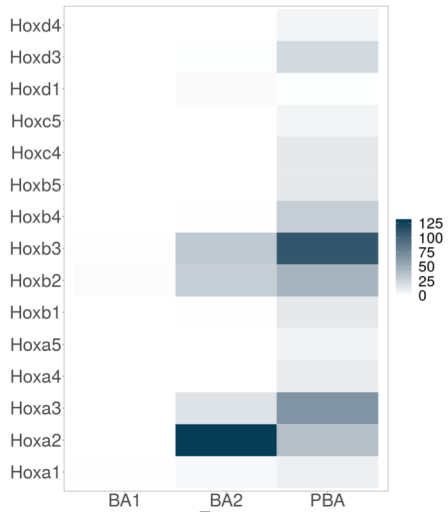

**C**

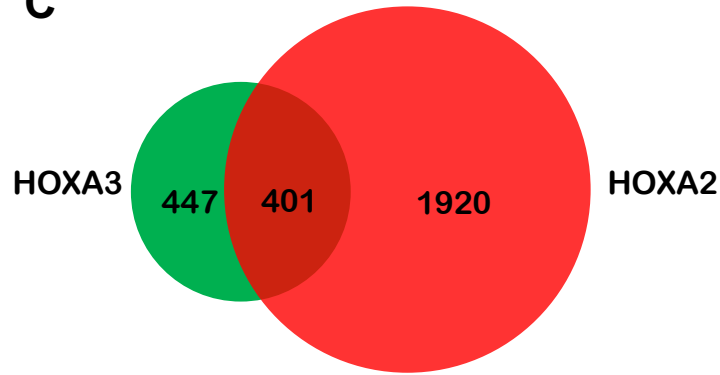

**D**

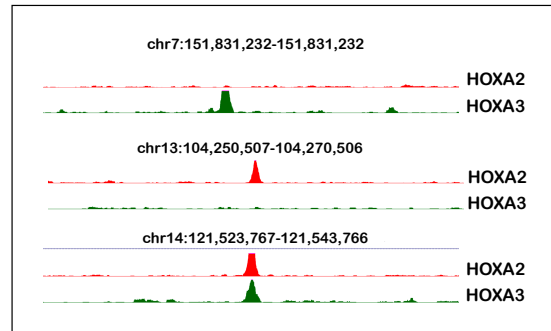

**E**

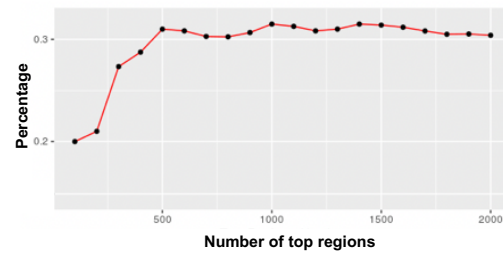

**F**

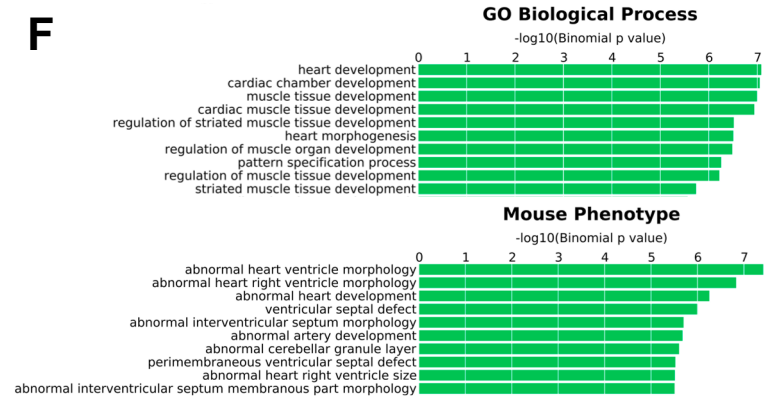

**G**

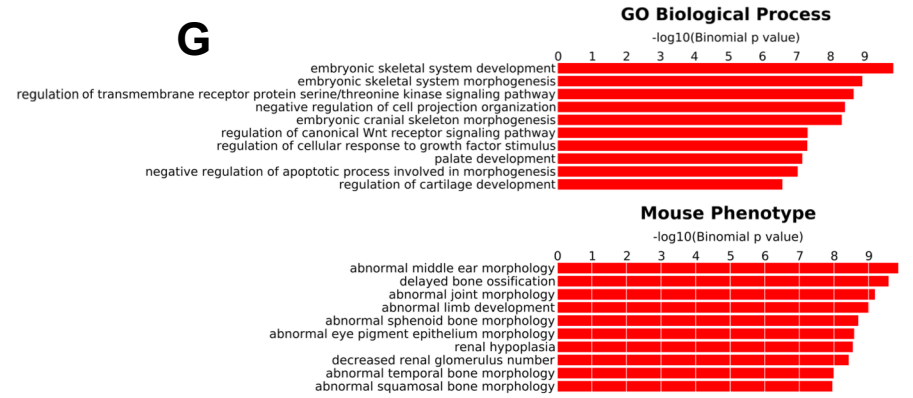

**H**

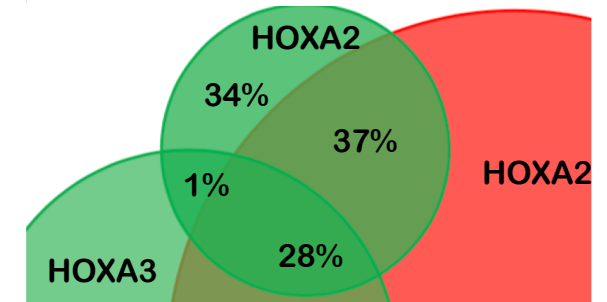

Figure 2

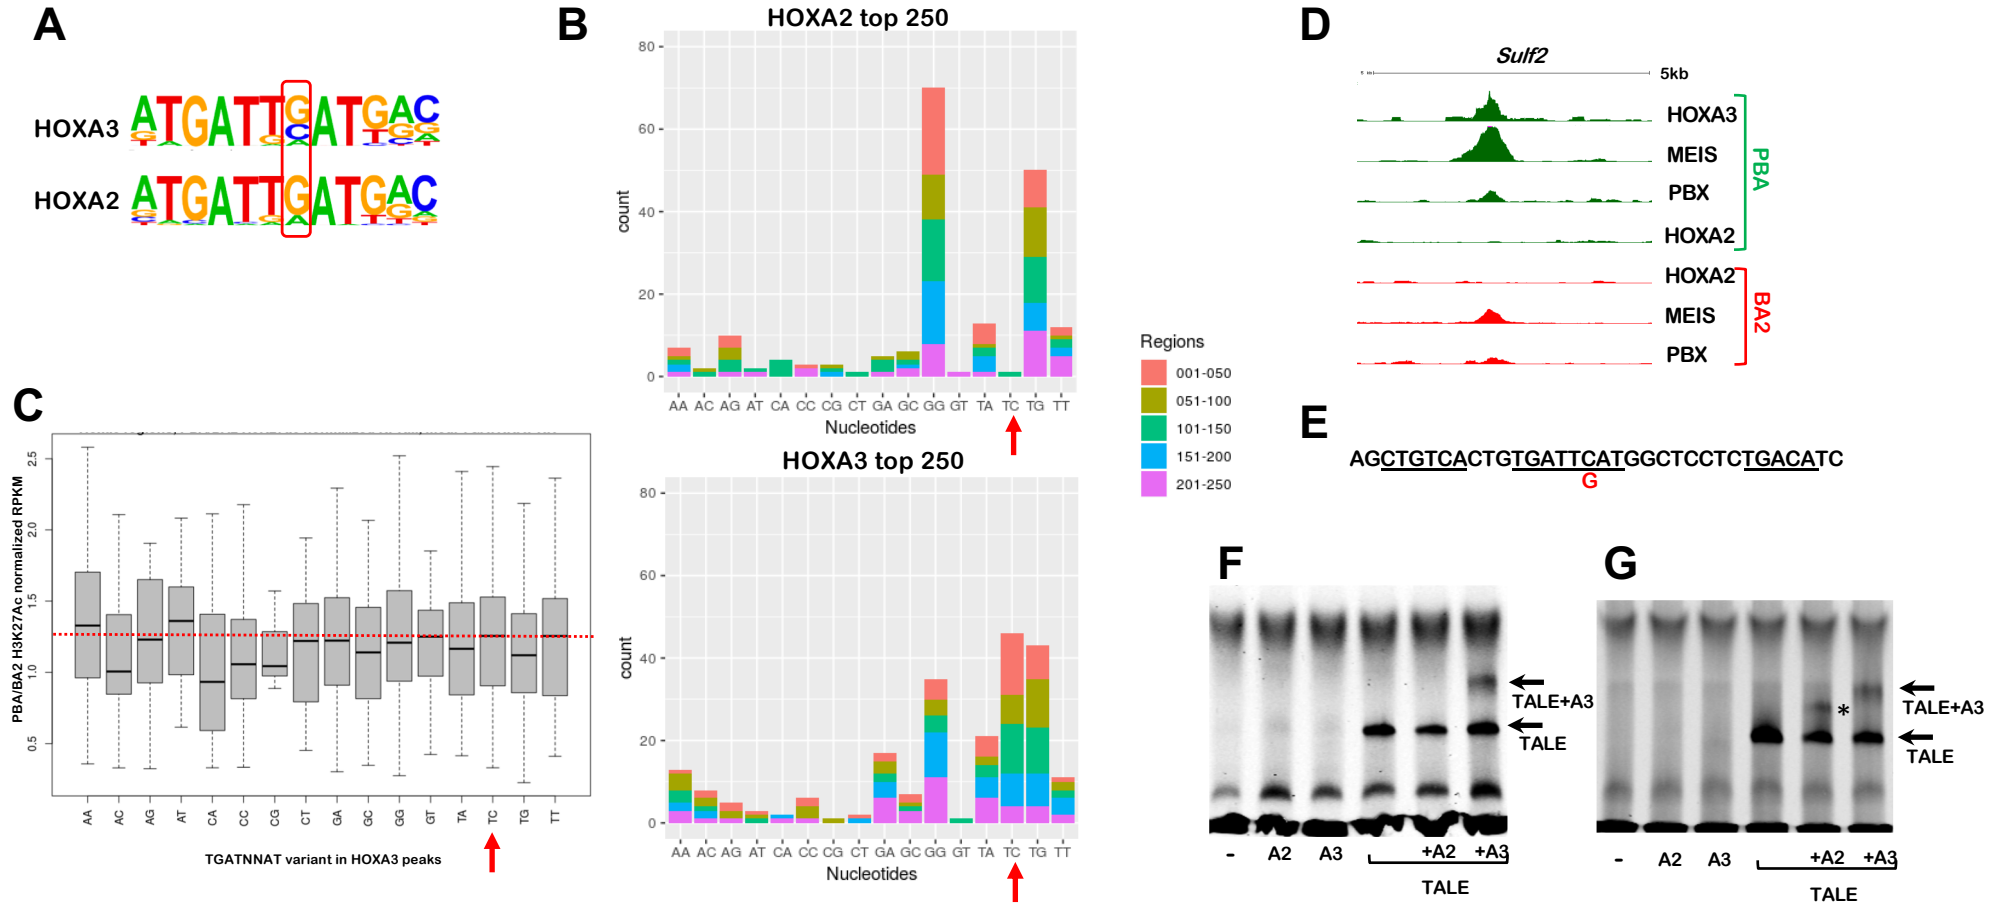

Figure 3

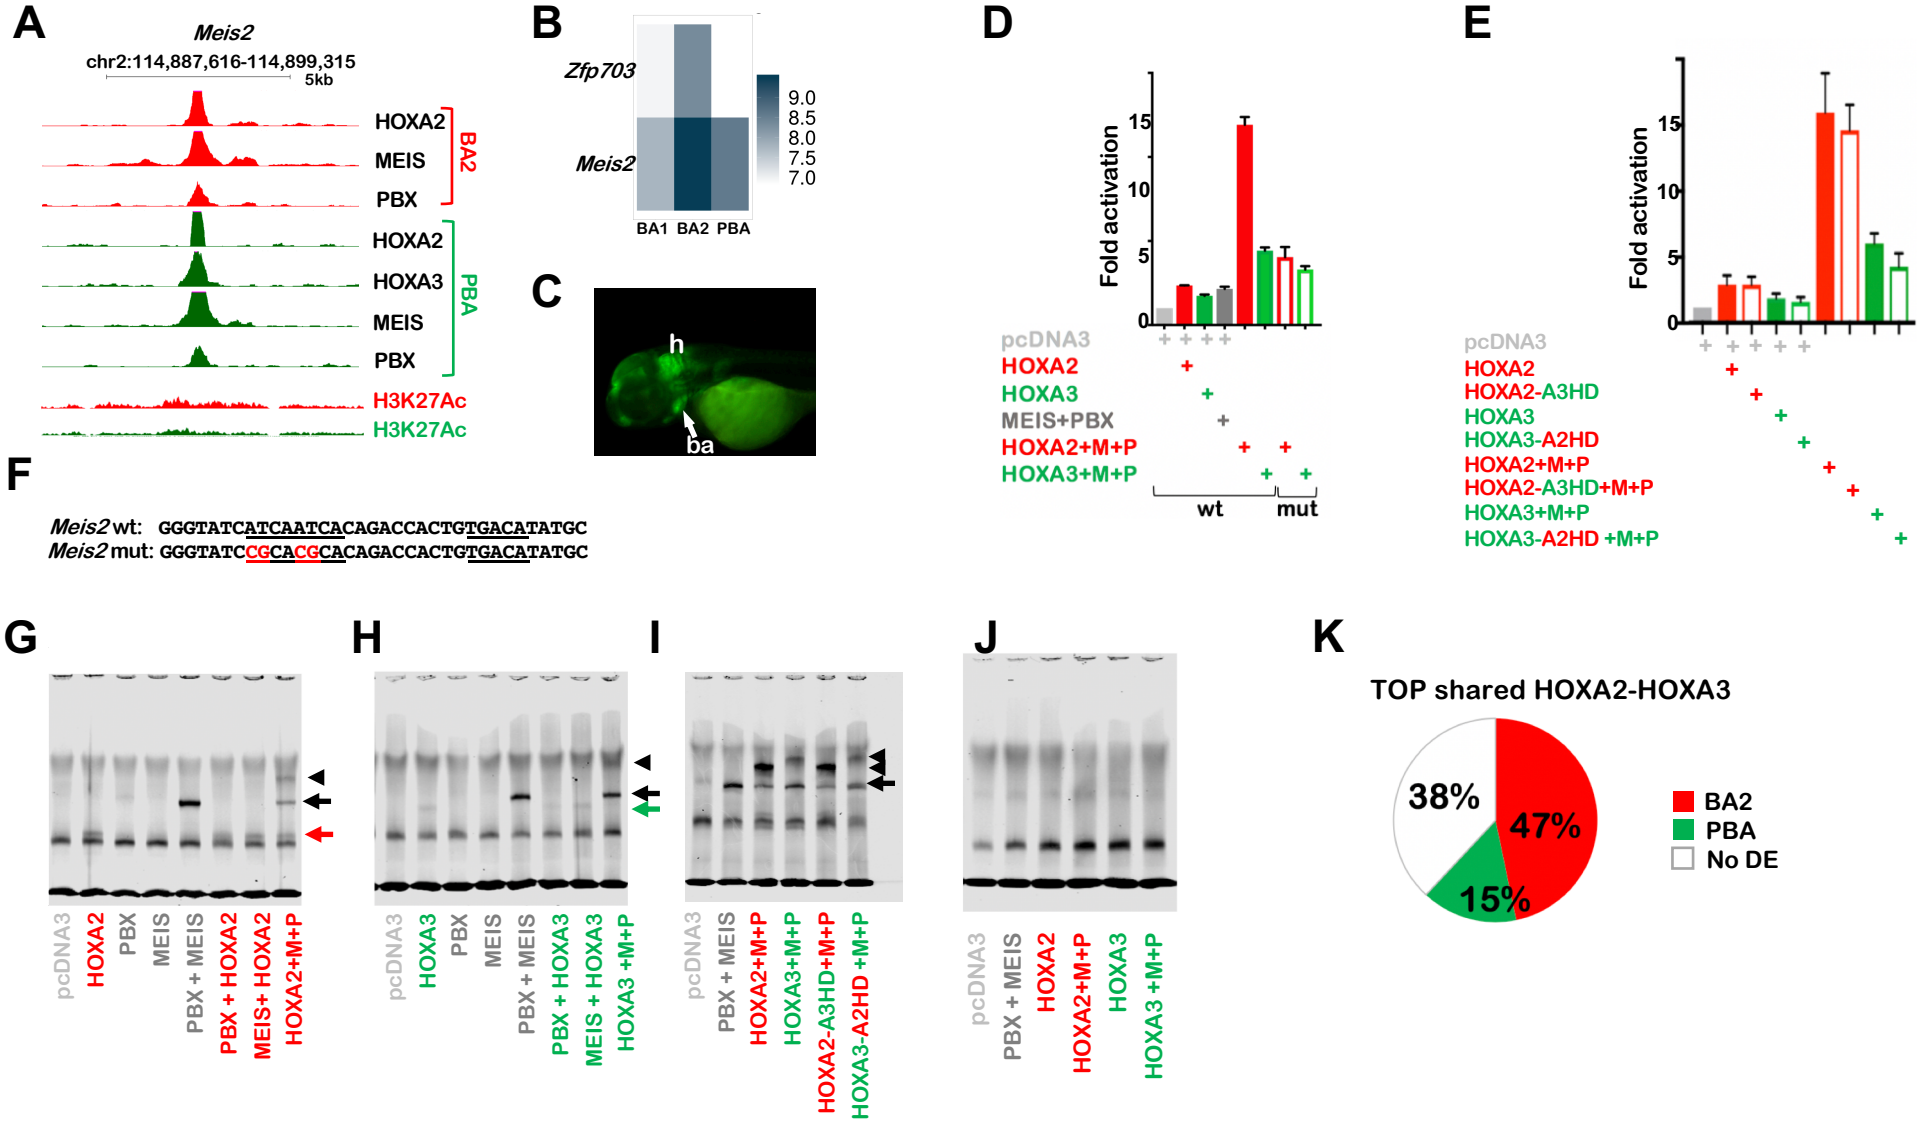

Figure 4

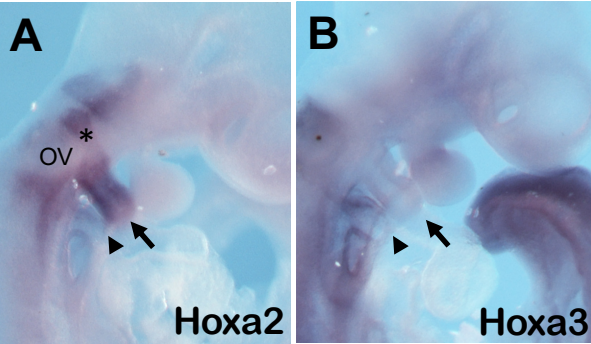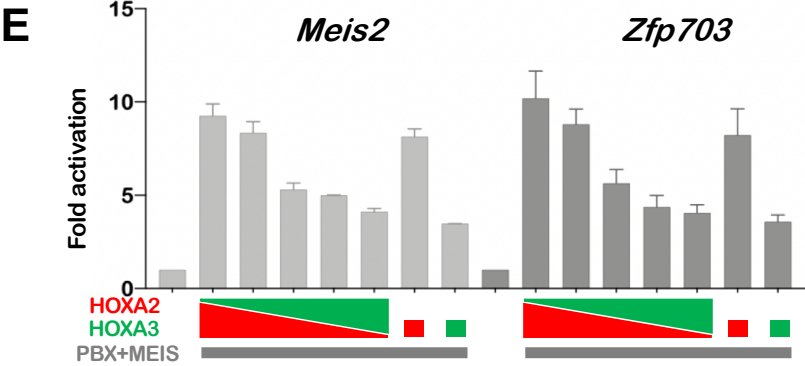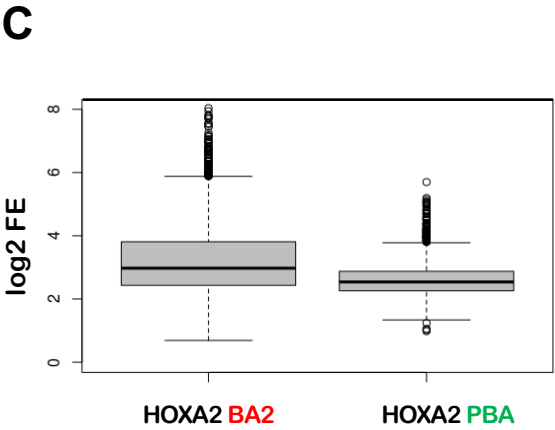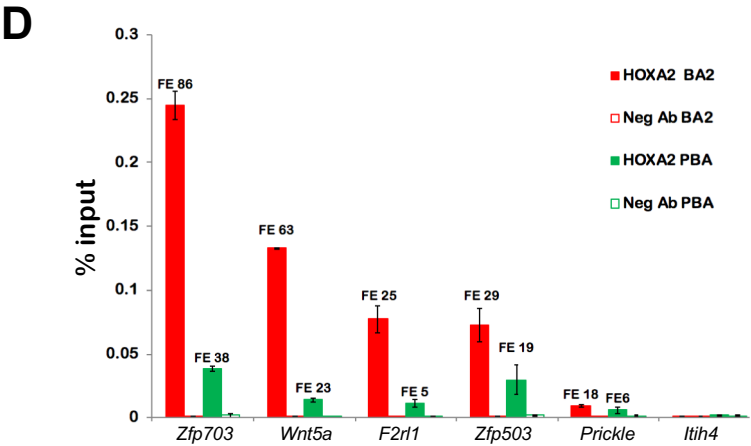

Figure 5

**A**

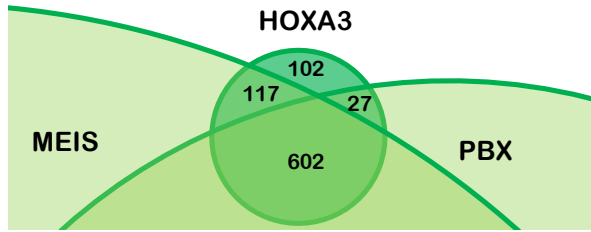

**B**

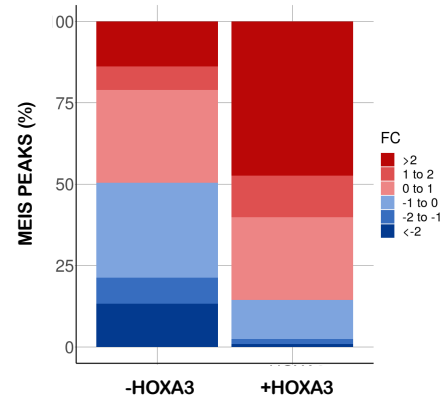

**C**

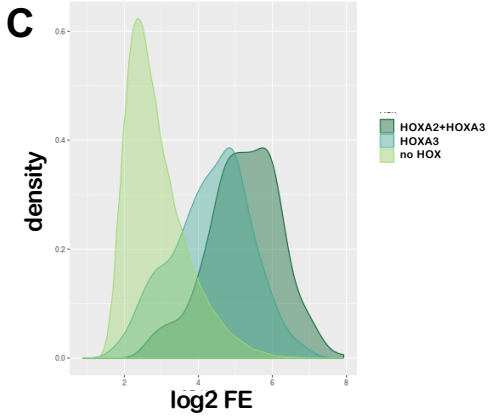

**D**

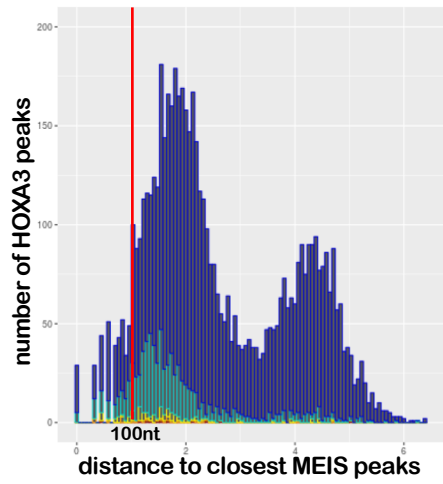

**E**

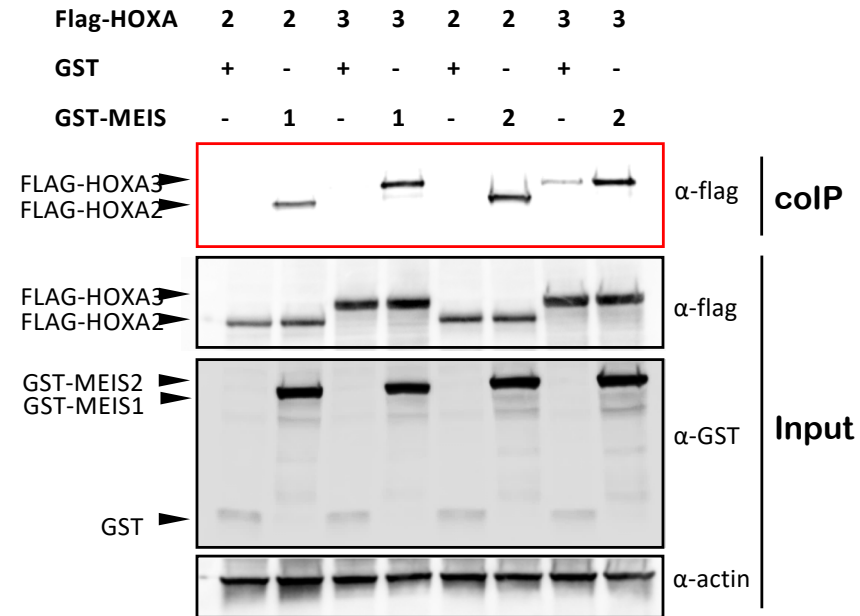

Figure 6

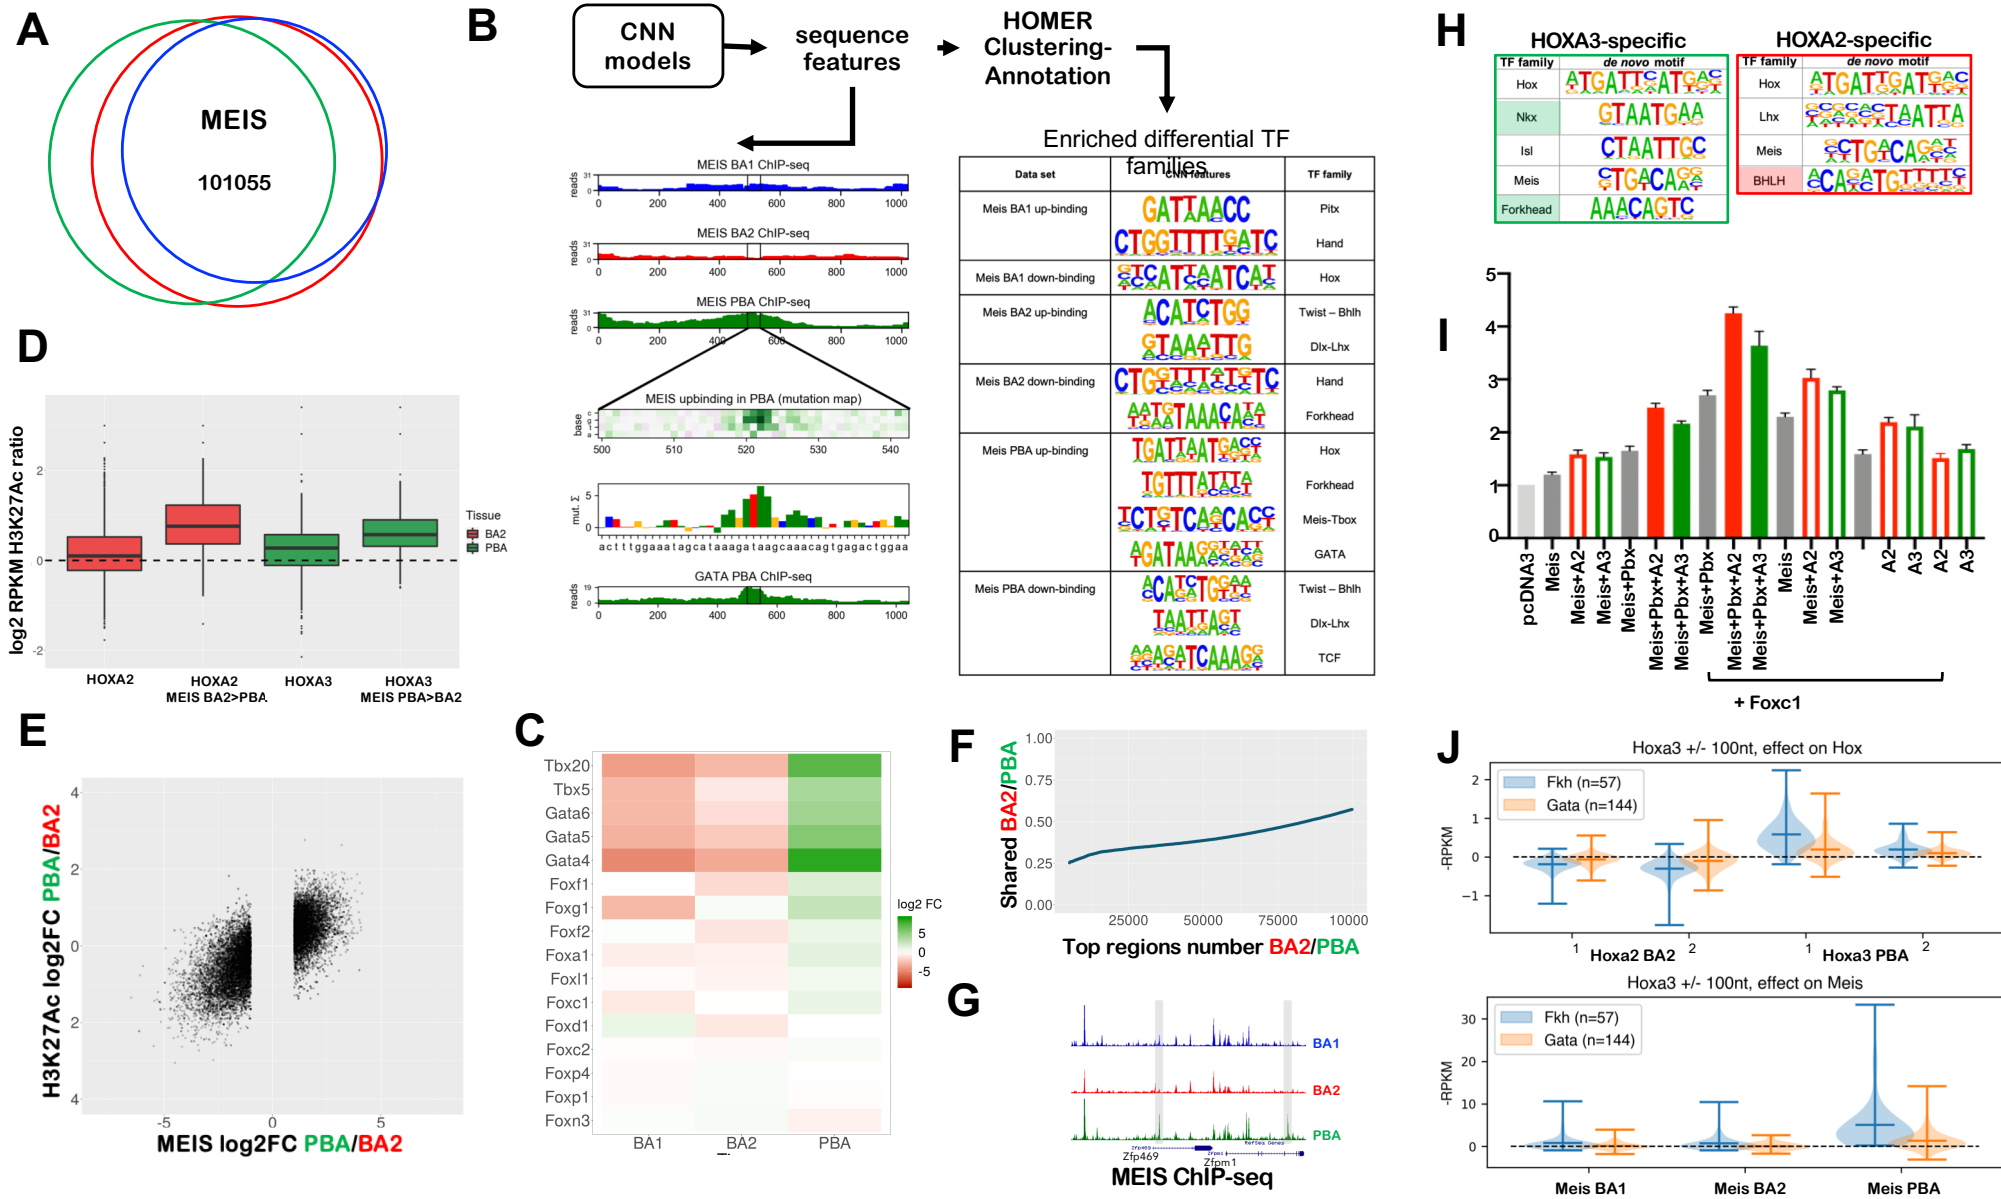

Figure 7

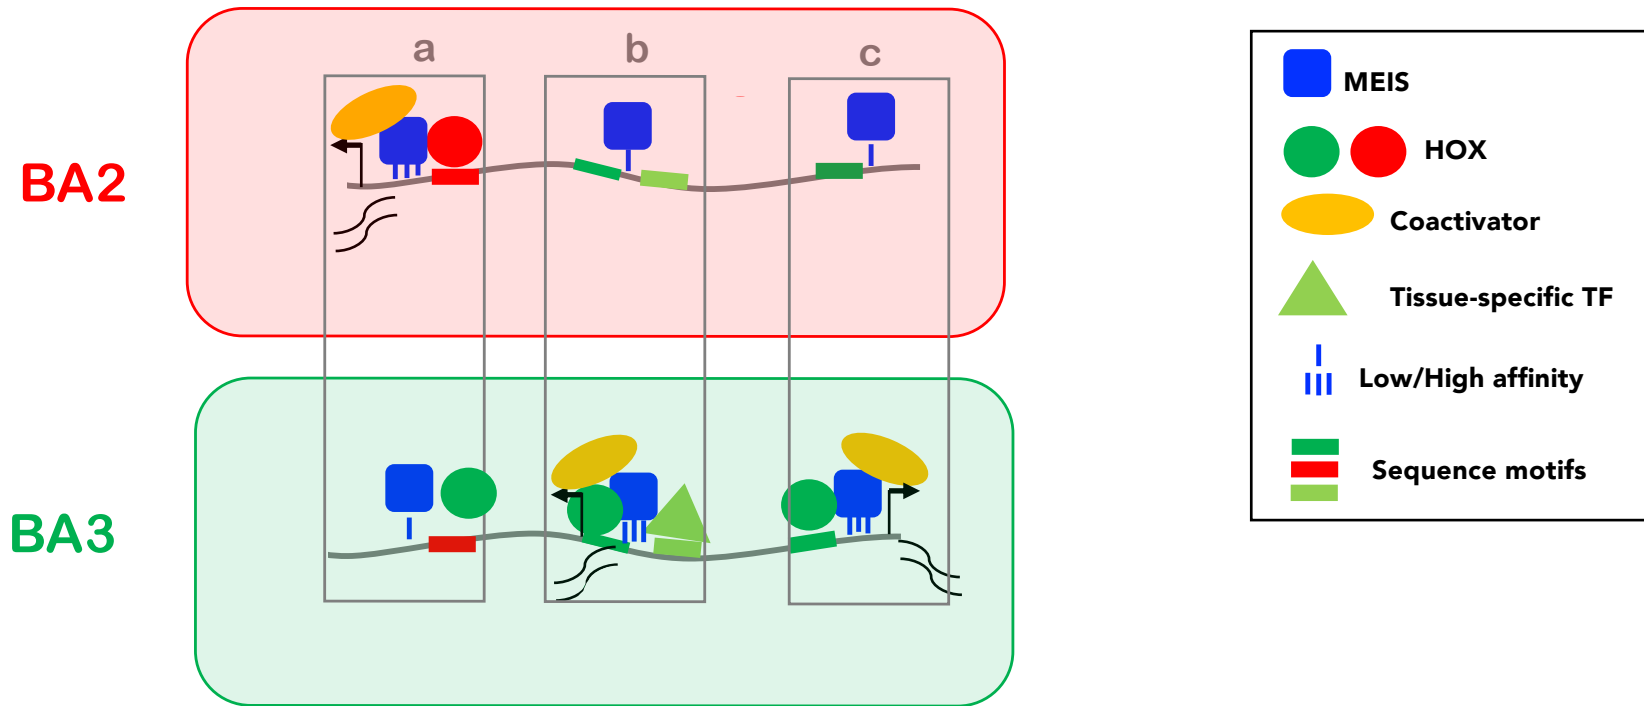

Source: https://www.biorxiv.org/content/10.1101/871640v1.full.pdf
